1  
2  
3  
4  
5  
6  
7  
8  
9  
10  
11  
12  
13  
14  
15  
16  
17  
18  
19  
20  
21

## The giant sequoia genome and proliferation of disease resistance genes

Alison D. Scott<sup>\*</sup>, Aleksey V. Zimin<sup>†,‡,§</sup>, Daniela Puiu<sup>†,§</sup>, Rachael Workman<sup>§,1</sup>, Monica Britton<sup>\*\*</sup>,  
Sumaira Zaman<sup>††</sup>, Madison Caballero<sup>‡‡</sup>, Andrew C. Read<sup>§§</sup>, Adam J. Bogdanove<sup>§§</sup>, Emily  
Burns<sup>\*\*\*,2</sup>, Jill Wegrzyn<sup>†††</sup>, Winston Timp<sup>§</sup>, Steven L. Salzberg<sup>†,§,‡‡‡</sup>, David B. Neale<sup>\*</sup>

<sup>\*</sup>Department of Plant Sciences, University of California, Davis, CA 95616

<sup>†</sup> Center for Computational Biology, Whiting School of Engineering, Johns Hopkins University,  
Baltimore, MD 21205

<sup>‡</sup> Institute for Physical Sciences and Technology, University of Maryland, College Park, MD  
20742

<sup>§</sup> Department of Biomedical Engineering, Johns Hopkins University, Baltimore, MD 21218

<sup>\*\*</sup>Bioinformatics Core, University of California, Davis, CA 95616

<sup>††</sup> Department of Computer Science and Engineering, University of Connecticut, Storrs, CT  
06269

<sup>‡‡</sup> Department of Molecular Biology and Genetics, Cornell University, Ithaca, NY 14850

<sup>§§</sup> Plant Pathology and Plant-Microbe Biology Section, School of Integrative Plant Science,  
Cornell University, Ithaca, NY 14853

<sup>\*\*\*</sup> Save the Redwoods League, San Francisco, CA 94104

<sup>†††</sup> Department of Ecology and Evolutionary Biology, University of Connecticut, Storrs, CT  
06269

22 ††† Departments of Computer Science and Biostatistics, Johns Hopkins University, Baltimore,  
23 MD 21218

24 <sup>1</sup> present address: Department of Molecular Biology and Genetics, Johns Hopkins University  
25 School of Medicine, Baltimore MD USA

26 <sup>2</sup> present address: Sky Island Alliance, Tucson, AZ 85701

27 Giant sequoia genome assembly: NCBI accession GCA\_007115665.1

28 Raw sequence data: NCBI accessions SRX5827056 - SRX5827083

29

30 **A high quality reference genome for giant sequoia**

31

32 Corresponding author:

33 Alison Dawn Scott

34 262C Robbins Hall, Mail Stop 4

35 University of California,

36 One Shields Avenue

37 Davis, CA 95616

38 530-752-8413

39 [aliscott@ucdavis.edu](mailto:aliscott@ucdavis.edu)

40

41

42 **KEY WORDS**

43 genome assembly, giant sequoia, *Sequoiadendron giganteum*, disease resistance genes, conifer,  
44 gymnosperm

45

46  
47

## ABSTRACT

48 The giant sequoia (*Sequoiadendron giganteum*) of California are massive, long-lived trees that  
49 grow along the U.S. Sierra Nevada mountains. As they grow primarily in isolated groves within  
50 a narrow range, conservation of existing trees has been a national goal for over 150 years.  
51 Genomic data are limited in giant sequoia, and the assembly and annotation of the first giant  
52 sequoia genome has been an important goal to allow marker development for restoration and  
53 management. Using Illumina and Oxford Nanopore sequencing combined with Dovetail  
54 chromosome conformation capture libraries, 8.125 Gbp of sequence was assembled into eleven  
55 chromosome-scale scaffolds. This giant sequoia assembly represents the first genome sequenced  
56 in the Cupressaceae family, and lays a foundation for using genomic tools to aid in giant sequoia  
57 conservation and management. Beyond conservation and management applications, the giant  
58 sequoia assembly is a resource for answering questions about the life history of this enigmatic  
59 and robust species. Here we provide an example by taking an inventory of the large and complex  
60 family of NLR type disease resistance genes.

61  
62  
63

## INTRODUCTION

64 Giant sequoia, *Sequoiadendron giganteum* (Lindl.) J.Buchh., is a California endemic  
65 conifer found in fragmented groves throughout the U.S. Sierra Nevada mountain range. Giant  
66 sequoias are known for their substantial size; individual specimens can reach over 90 m in  
67 height, more than 10 m in diameter, and may exceed 1000 m<sup>3</sup> of wood volume (Sillett et al.,  
68 2015). In addition to their considerable proportions, giant sequoias are among the oldest tree  
69 species, as individuals can live for over 3,200 years (Douglass, 1919). Giant sequoias are one of

70 the two redwood species in California, where they share the title of state tree with their closest  
71 relative, the coast redwood (*Sequoia sempervirens* Endl.).

72         Though they have occupied their current range for millennia and were known by  
73 indigenous people for centuries before colonizers arrived, giant sequoias became icons of the  
74 American west beginning with the exploitation of the Discovery Tree in 1853 (Cook, 1961).  
75 Despite the brittle nature of their wood, historical research indicates a third of groves were either  
76 completely or partially logged (Elliot-Fisk et al., 1997, cited by Burns et al., 2018). Giant  
77 sequoias were first protected in 1864 (Cook, 1961), and have remained a cornerstone of the  
78 American conservation movement ever since.

79         While the majority (98%) of remaining giant sequoia groves are now protected (Burns et  
80 al., 2018), the species is listed as endangered (IUCN) and is overall experiencing a decline  
81 (Schmid & Farjon, 2013). The dwindling numbers of giant sequoia are largely attributed to a  
82 lack of reproductive success due in part to fire suppression over the last century (Stephenson,  
83 1994), as giant sequoia trees rely on extreme heat to open their cones and release seeds in  
84 addition to preparing the understory for germination. Mature giant sequoias in natural stands  
85 appear to withstand most pests and diseases, but relatively little is documented about the  
86 potential impact of insects and pathogens on younger trees. Recent research suggests giant  
87 sequoias are potentially susceptible to bark beetles, which can exacerbate the impacts of drought  
88 (Stephenson et al., 2018).

89         In plants, disease resistance is typically conferred by genes encoding nucleotide binding  
90 leucine-rich repeat (NLR) proteins that individually mediate responses to different pathogens. In  
91 crop species, NLR genes have demonstrated contributions to resistance against insects (Stahl et

92 al., 2018), and a recent examination of transcriptome data from several conifer species showed  
93 that many conifer NLRs were induced following drought stress (Van Ghelder et al., 2019),  
94 suggesting an even broader role. Their importance in resilience to disease and abiotic stress  
95 makes cataloging NLR genes of particular interest for conservation and management. Notably,  
96 however, across species and even among plant populations, NLR genes account for the majority  
97 of copy-number and presence/absence polymorphisms (Yu et al., 2011; Zheng et al., 2011; Xu et  
98 al., 2012; Bush et al., 2013; Schatz et al., 2014), and this complexity makes accurate inventory  
99 challenging in the absence of a high quality genome assembly.

100 More broadly, a whole genome reference assembly provides a foundation for  
101 understanding the distribution of genetic variation in a species, which is critical for conservation  
102 and management. Though studies of population genetics and phylogenetics of giant sequoia have  
103 been conducted using isozymes, microsatellites, RADseq, and transcriptomic data (Fins and  
104 Libby, 1982; DeSilva & Dodd, 2014; Dodd & DeSilva, 2016; Scott et al., 2016) there is a dearth  
105 of robust genomic resources in this species. The closest species with fully sequenced genomes  
106 exist entirely in the family Pinaceae, which last shared a common ancestor with giant sequoia  
107 (Cupressaceae) more than 300 million years ago (Leslie et al., 2018).

108 A combination of short-read Illumina data, long-read Oxford Nanopore data, and  
109 Dovetail proximity ligation libraries produced a highly contiguous assembly with  
110 chromosome-scale scaffolds, many of which are telomere-to-telomere. This assembly also  
111 includes the largest scaffolds assembled to date in any organism. The genome was found to  
112 contain over 900 complete or partial NLR genes, of which over 250 are in consensus with  
113 annotation derived from protein evidence and gene modeling. The giant sequoia genome

114 assembly and annotation presented here is an unprecedented resource in conifer genomics, both  
115 for the quality of the assembly and because it represents an understudied branch of the  
116 gymnosperm tree of life.

117  
118

## 119 MATERIALS AND METHODS

120

### 121 Sequencing and assembly

122

#### 123 *Megagametophyte DNA extraction and sequencing*

124 Cones were collected from a 1,360-year-old giant sequoia (SEGI21, Sillett et al., 2015) in  
125 Sequoia/Kings Canyon National Park in 2012. As in previous conifer genome sequencing  
126 projects (e.g. Zimin et al., 2014), the megagametophyte from a single fertilized seed was  
127 dissected out and its haploid DNA extracted with a Qiagen DNeasy Plant Kit (Hilden, Germany),  
128 followed by library preparation with an Illumina TruSeq Nano kit using the low throughput  
129 protocol. This megagametophyte library was then sequenced on 10 lanes of an Illumina HiSeq  
130 4000 with 150 bp paired-end reads at the UC Davis Genome Center DNA Technologies Core  
131 facility.

132

#### 133 *Foliage DNA extraction and Nanopore sequencing*

134 In 2017 foliage was collected from the upper canopy of the same giant sequoia tree (SEGI21).  
135 From this foliage, high molecular weight DNA was extracted following the protocol described  
136 here ([dx.doi.org/10.17504/protocols.io.4vbgw2n](https://doi.org/10.17504/protocols.io.4vbgw2n)) . Briefly, purified genomic DNA was isolated  
137 through a nuclei extraction and lysis protocol. First, mature leaf tissue was homogenized in  
138 liquid nitrogen until well-ground, then added to a gentle lysis buffer (after Zhang et al., 2016,

139 containing spermine, spermidine, triton, and  $\beta$ -mercaptoethanol) and stirred at 4°C for ten  
140 minutes. Cellular homogenate was filtered through five layers of Miracloth into a 50mL Falcon  
141 tube, then centrifuged at 4°C for 20 minutes at 1900 x g, which was selected based on the  
142 estimated giant sequoia genome size of around 9 Gb (Zhang et al., 2012; Hizume et al., 2001).  
143 Extracted nuclei were then lysed and gDNA precipitated using the Circulomics Nanobind Plant  
144 Nuclei Big DNA kit - alpha version (SKU NB-900-801-01). Then 1  $\mu$ g of purified genomic  
145 DNA was input into the Ligation sequencing kit (LSK108-LSK109, Oxford Nanopore),  
146 according to protocol, with the exception of end repair optimization (100  $\mu$ L sample, 14  $\mu$ L  
147 enzyme, 6  $\mu$ L enzyme at 20°C for 20 minutes, then 65°C for 20 minutes). Samples were  
148 sequenced on R9.4 minION flowcells using either the minION or GridION for 48 hours, then  
149 raw fast5 data was basecalled with Albacore version 2.13.

150

### 151 *Hi-C and Chicago library preparation and sequencing*

152 Additional foliage from SEGI21 was submitted to Dovetail Genomics (Scotts Valley, CA) for  
153 Hi-C and Chicago library preparation as described by Putnam et al., 2016. Hi-C libraries  
154 preserve *in vivo* chromatin structures while Chicago libraries are based on *in vitro* reconstituted  
155 chromatin; the combination of these two approaches allows for marked improvement in  
156 contiguity for genome assemblies. Three Hi-C libraries and two Chicago libraries passed QC for  
157 sequencing and were sent to the UC San Francisco Center for Advanced Technology where they  
158 were pooled and sequenced on an Illumina Novaseq 6000 in a single lane of an S4 flowcell (PE  
159 150 bp).

160

161 *Genome assembly*

162 Assembly of the giant sequoia genome involved two major steps: contig assembly from Illumina  
163 and Oxford Nanopore reads and scaffolding with Chicago and Hi-C data by Dovetail Genomics.  
164 Contigs were produced using MaSuRCA assembler version 3.2.4 (Zimin et al, 2013, Zimin et al,  
165 2017) with the default parameters. Then the sequence data from the two Chicago libraries were  
166 used to scaffold the initial contig assembly using Dovetail's HiRise software (Putnam et al.,  
167 2016). Following this step, the output assembly comprised of Illumina, Oxford Nanopore, and  
168 Chicago data plus the Hi-C data was used as input for a second run of HiRise re-scaffolding  
169 software. The initial contig assembly was named giant sequoia 1.0 and the final scaffolded  
170 assembly giant sequoia 2.0.

171  
172 *Identification of centromeric and telomeric repeats*  
173 Tandem repeat elements up to 500 bp long were identified with the tandem repeat finder program  
174 (trf v4.09; Benson, 1999) with the recommended parameters (max mismatch delta PM PI  
175 minscore maxperiod, 2 7 7 80 10 50 500 resp.). A histogram of repeat unit lengths was then  
176 produced, which had the peaks at 7, 181, and 359 bp.

177  
178 **Annotation**

179 *RNA isolation and sequencing*

180 RNA was isolated from giant sequoia roots, foliage, and cambium using a LiCl-Urea buffer  
181 followed by cleanup using Zymo columns and reagents (Zymo Research, Irvine, CA). RNA



182 quality was assessed using an Experion Electrophoresis System (Bio-Rad, Hercules, CA) and  
183 Qubit fluorometer (Thermo Fisher Scientific, Waltham, MA).

184 Double-stranded cDNA was generated from total RNA (2 µg per tissue) using the  
185 Lexogen Telo™ prime Full-length cDNA Kit (Lexogen, Inc., Greenland, NH, USA).  
186 Tissue-specific cDNAs were first barcoded by PCR (16-19 cycles) using IDT barcoded primers  
187 (Integrated DNA Technologies, Inc., Coralville, Iowa), and then bead-size selected with AMPure  
188 PB beads (two different size fractions of 1X and 0.4X). The three cDNAs were pooled in  
189 equimolar ratios and used to prepare a SMRTbell™ library using the PacBio Template Prep Kit  
190 (PacBio, Menlo Park, CA). The SMRTbell™ library was then sequenced on a Sequel v2 SMRT  
191 cell with polymerase 2.1 and chemistry 2.1 (P2.1C2.1) on one PacBio Sequel v2 SMRT cell at  
192 the UC Davis Genome Center DNA Technologies Core Facility.

193

#### 194 *Processing of IsoSeq data*

195 Raw IsoSeq subreads were processed using the PacBio IsoSeq3 v3.0 workflow  
196 ([https://github.com/PacificBiosciences/IsoSeq/blob/master/README\\_v3.0.md](https://github.com/PacificBiosciences/IsoSeq/blob/master/README_v3.0.md)). Briefly, ccs  
197 v.3.0.0 was run to merge subreads one full-length circular consensus sequence (ccs) per Zero  
198 Mode Waveguide (ZMW). Then, lima v.1.7.0 was run to remove primer artifacts and to  
199 demultiplex the ccs by library barcode. Finally, isoseq3 cluster 3.0.0 was run to cluster the  
200 demultiplexed CCS reads into transcripts.

201

#### 202 *Repetitive element library generation and masking*

203 RepeatModeler (2.0; Smit and Hubley, 2008) was used to detect *de novo* repeats in the giant  
204 sequoia 2.0 assembly, after scaffolds shorter than 3 kbp were removed. The resulting repeat  
205 library with classification was used as input for RepeatMasker (v4.0.9, Smit, Hubley, and Green,  
206 2013) which soft masks repetitive elements in the genome. After this initial repeat masking using  
207 the *de novo* giant sequoia repeat library, RepeatMasker was run using a library of conifer repeats  
208 identified in other gymnosperm species clustered at 80% to further mask repetitive elements.

209

### 210 *Structural annotation*

211 PacBio IsoSeq data and previously published Illumina RNAseq data (Scott et al., 2016) were  
212 mapped to the soft masked genome, using Minimap2 v.2.12 (Li, 2018) for the long-read data and  
213 HISAT2 v.2.1.0 (Kim, Langmead, and Salzberg, 2015) for short reads. The resulting alignment  
214 files were merged and sorted, then used alongside protein evidence generated with  
215 GenomeThreader (Gremme et al., 2005) as input to Braker2 v2.1.2 (Hoff et al., 2019; Hoff et al.,  
216 2015; Stanke et al., 2008; Stanke et al., 2006) to generate putative gene models.

217

### 218 *Functional annotation*

219 Structural gene predictions were used as input for Eukaryotic Non-Model Transcriptome  
220 Annotation Pipeline (EnTAP; Hart et al., 2019), to add functional information and to and identify  
221 improbable gene models. EnTAP was run in runP mode with *taxon* = Acrogymnospermae using  
222 the RefSeq Plant and SwissProt databases plus a custom conifer protein database (O’Leary et al.,  
223 2016; The Uniprot Consortium, 2019). To further filter putative gene models, gFACs (Caballero  
224 and Wegrzyn, 2019) was used, first by separating multiexonic and monoexonic models.

225 Multiexonics were retained after filtering out models with non-canonical splice sites,  
226 micro-introns and micro-exons (<20 bp), and in-frame premature stop codons to ensure correct  
227 geneic structure. Additionally, to control for function, genes annotating through Inteprosan  
228 (Jones et. al., 2014) as retrodomains (including gag-polypeptide, retrotransposon, reverse  
229 transcriptase, copia, gypsy, and ty1) were discarded. In addition, any multi-exonic models that  
230 lacked functional annotation either with a sequence similarity hit or gene family assignment were  
231 removed. Additionally, gffcompare (<https://ccb.jhu.edu/software/stringtie/gffcompare.shtml>)  
232 identified overlap between gene models and softmasked regions of the genome, and multi-exonic  
233 gene models were removed if more than 50% of their length fell in masked regions. Clustered  
234 transcriptome sequences were aligned to the genome using GMAP (v. 2018-07-04; Wu &  
235 Watanabe, 2005; Wu & Nacu, 2010) with a minimum trimmed coverage of 0.95 and a minimum  
236 identity of 0.95. To determine overlap and nesting of gene models with this high confidence  
237 transcriptomic alignment, BEDtools (Quinlan and Hall, 2010). BUSCO v.3.0.2 (Simao et al.,  
238 2015) was used to assess the completeness of the filtered gene space.

#### 239 240 *Orthogroup assignment of proteins*

241 Translated UniGenes for all available gymnosperms were downloaded from the forest genomics  
242 database TreeGenes (<https://treegenesdb.org/>; Wegrzyn et al., 2019; Falk et al., 2018). The  
243 corresponding files from the *Amborella trichopoda* genome assembly were also included to  
244 provide an outgroup to the gymnosperm taxa. Each taxon was evaluated for completeness with  
245 BUSCO v4.0.2 in protein mode. All taxa with over 60% completeness were included in  
246 OrthoFinder (Emms and Kelly 2015; Emms and Kelly 2019) to identify orthogroups. The longest

247 sequence in each orthogroup was retained, regardless of source species. Species-specific  
248 orthogroups unique to giant sequoia were noted. The resulting nonredundant species-specific  
249 orthogroups were functionally annotated with EnTAP in runP mode with taxon =  
250 *Sequoiadendron* using the RefSeq Plant and SwissProt databases.

251  
252 *Gene family evolution*  
253  
254 Following orthogroup assignment with OrthoFinder, a species tree and orthogroup statistics were  
255 used as input for CAFE v4.1 (Han et al., 2013) to assess gene family contraction and expansion  
256 dynamics, using a single birth/death parameter ( $\lambda$ ) across the phylogeny. Gene families in the  
257 giant sequoia lineage experiencing rapid evolution were then functionally annotated using  
258 EnTAP.

259  
260 *Annotation and analysis of NLR genes*  
261 NLR genes were identified using the NLR-Annotator pipeline (Steuernagel et al., 2018) on the  
262 giant sequoia 2.0 assembly, then that output was cross-referenced with the genome annotation.  
263 Using the genome annotation file and the NLR gene file as input, the BEDtools intersect function  
264 (Quinlan and Hall, 2010) was used to identify putative NLRs that were also present in the  
265 annotation, requiring features in the NLR gene file to overlap with 100% of the annotation  
266 feature. NLR-gene maximum likelihood trees were generated with RAxML v8.2.12 (Stamatakis,  
267 2014) using the amino acid sequence of the central NB-ARC<sub>[AB2]</sub> domain output by  
268 NLR-Annotator. NB-ARC domains that included greater than 50% missing data were excluded  
269 from all analyses. The best trees were visualized with the Interactive Tree of Life (iTOL) tool,

270 with bootstrap values shown (Letunic and Bork, 2016). Determination of TIR and CC domains  
271 was based on motif data from Jupe and colleagues (2012). RPW8-like motifs were determined  
272 by alignment to a recently described RNL motif (CFLDLGxFP) (Van Ghelder et al., 2019).

#### 273 274 **Data availability**

275 The genome assembly of giant sequoia is available at NCBI under accession GCA\_007115665.2,  
276 and raw sequence data are available under accessions SRX5827056 - SRX5827083. Annotation  
277 files are available at <https://treegenesdb.org/FTP/Genomes/Segi>.

278  
279  
280

## 281 **RESULTS AND DISCUSSION**

### 282 283 **Sequencing and assembly**

284 Assembly of the giant sequoia genome leveraged sequence data from four libraries (Table 1).  
285 Illumina reads (135x) from a haploid megagametophyte library combined with Oxford Nanopore  
286 sequence from foliage (21x) contributed to the contig assembly. The contig assembly was  
287 subsequently scaffolded with data from Dovetail Chicago (47x) and Hi-C libraries (76x) in  
288 succession.

289

#### 290 *Giant sequoia 1.0 assembly*

291 Initial contig assembly of the Illumina and Oxford Nanopore sequence data yielded giant sequoia  
292 1.0. The initial contig assembly giant sequoia 1.0 had a contig N50 of 359,531 bp and a scaffold  
293 N50 of 489,478.

294 Genome size was estimated by counting 31-mers (all sub-sequences of 31 bases) in the  
295 Illumina reads and computing the histogram of the kmer frequencies vs. counts using jellyfish  
296 tool version 2.0 (Marcais et al., 2011). The histogram of 31-mer frequency counts had its largest  
297 peak at 101 (see Figure 1). There was a small second peak at 204, roughly double the highest  
298 31-mer frequency was 101, likely corresponding to 2x repeat sequences in the genome. The  
299 k-mer coverage of the genome was then estimated by computing the area under the curve for  
300 frequencies between 1 and 10000 and dividing that number by 101. This method arrived at the  
301 genome size estimate of 8,588 Gbp.

302 The intermediate step of correction of the Nanopore in MaSuRCA resulted in 24,279,305  
303 mega-reads with an average read length of 6,726 bp. The consensus error rate for the assembly  
304 was estimated by aligning the Illumina reads to the contigs with bwa mem (Li, 2013) and then  
305 calling variants with freebayes (Garrison et al., 2012) software. Any site in the consensus that  
306 had no Illumina reads agreeing with the consensus and at least three Illumina reads agreeing on  
307 an alternative variant was considered an error. The total number of bases in the error variants  
308 were counted and divided by the total number of bases in the contigs. This yielded an assembly  
309 error rate of 0.3 errors per 10000 bases, or consensus quality of 99.997%.

310 The initial contig assembly giant sequoia 1.0 had a contig N50 of 347,954 bp and a scaffold N50  
311 of 490,521.

312

### 313 *Giant sequoia 2.0 assembly*

314 The Dovetail HiRise Chicago and Hi-C assembly increased the total assembly size marginally, to  
315 8.125 Gbp, but notably yielded a large increase in the N50 to 690.55Mb (Table 2). The overall

316 number of scaffolds was reduced to 8,125, and the N90 of the final assembly was 690.55Mb. It is  
317 worth noting that the largest scaffold in this assembly is 985 Mbp in length, making it the longest  
318 contig assembled to date in any organism.

319 The tandem repeat finder program (trf v4.09, G. Benson 1999) identified repeat elements  
320 up to 500 bp long, and those data were used to plot a histogram of repeat unit lengths which had  
321 peaks at 7, 181, and 359 bp. Based on the position and clustering along the chromosomes, the  
322 7-mer was identified as the telomeric repeat and the 181-mer as the centromeric one.

323 The most common telomeric 7-mers were TTTAGGG (present in most land plants), and  
324 TTGAGGG. The two 7-mers alternate and have similar frequencies.

325 The 181 bp centromeric repeat unit consensus sequence was

326 AAAAATTGGAGTTCGCGTGACACAGATGCAACGTAGCCTTAAAATCAGGTCTTCGCCGAA  
327 CTCGACATTAATCGATGGAAATTCAACATTCACGAAAACACTGATAGAAAATAAAGGTTCTT  
328 AATAGTCATCTACAACACAATCTAAATCAAAGTTCTCCAAACATGGTTGATTATGGGTG.

329 By looking at the positions of the centromeric and telomeric repeats, a mis-assembly was  
330 identified in the original HiRise reference. Two centromeric and one telomeric region were  
331 located in the middle of the longest scaffold (1.82Gb), and subsequently this scaffold was split  
332 into chr1 (0.95Gb) and chr3 (0.84Gb).

333 There are 11 chromosomes in giant sequoia (Buccholz, 1939; later confirmed by Jensen  
334 and Levan, 1941 and Schlarbaum and Tschuiya, 1984), and the 11 largest scaffolds in the  
335 assembly span across the centromere (Table 3), suggesting a chromosome-level assembly. The 11  
336 largest scaffolds range from 443 Mbp to 985 Mbp in size. Of these 11 scaffolds, seven include  
337 telomeric sequence on both ends. The remaining four scaffolds have telomeric sequence on one

338 end. Beyond the 11 largest scaffolds, the next largest (Sc7zsyj\_3574) (171 Mb) includes telomere  
339 at one end, suggesting it is a substantial portion of a chromosome arm for one of the scaffolds  
340 with only one telomere (chromosomes 1, 3, 6, and 9).

341

#### 342 *Assessing assembly completeness*

343 For a rough estimate of the assembly completeness, BUSCO v3.0.2 was run with the  
344 embryophyta database (Simao et al., 2015) of 1440 genes. For the complete giant sequoia 2.0  
345 genome, the tool found 559 complete BUSCOs out of which 515 were in a single copy, 44 were  
346 duplicated, and 133 were fragmented BUSCOs (Table 4). Another 748 BUSCOs were missing.  
347 In both the full giant sequoia 2.0 assembly and the version filtered to remove all scaffolds  
348 smaller than 3 kbp, completeness was estimated at 38% using BUSCO. Assembly completeness  
349 of other conifer assemblies (Supplementary Table S1) range from 27-44%, suggesting giant  
350 sequoia 2.0 completeness is consistent with existing work. Despite the contiguity of the  
351 assembly, the BUSCO completeness of the genome appears lower than expected, likely due to  
352 the presence of very long introns in conifers, which can inhibit identification of genes.

353

#### 354 *Comparison to existing gymnosperm assemblies*

355 The contiguity of giant sequoia 2.0 is most apparent when comparing with other gymnosperm  
356 assemblies (Table 5). Giant sequoia 2.0 has an N50 scaffold size of 690Mb, an order of  
357 magnitude larger than scaffold N50s reported in other conifers.

358

#### 359 **Annotation of giant sequoia 2.0**



360 *Repeat annotation*

361 Using the custom repeat database created by RepeatModeler, the majority (72.85%) of the giant  
362 sequoia genome was softmasked. Subsequent masking using conifer-specific repeat libraries  
363 yielded an additional 6% of masked sequence. LTRs were the most abundant known element  
364 (28%, Supplementary Table S2) in the masked sequence. These results are comparable to  
365 observations from different conifer species, e.g. the most recent *Pinus lambertiana* assembly  
366 contained 79% repetitive sequence (Stevens et al., 2016). That our observations are consistent  
367 with the only conifer lineage sequenced until now (Pinaceae) is not surprising, as all conifers  
368 have large genome sizes, and this genomic bloat is attributed to the proliferation of repetitive  
369 elements throughout the genome (Neale et al., 2014).

370

371 *Gene Annotation*

372  
373 Structural annotation using BRAKER2 resulted in 1,460,545 predicted gene models, with an  
374 average intron length of 2,362 bp (Table 6). The average CDS length was 613 bp, including both  
375 multi- and mono-exonic models. The initial gene set included models with long introns, with the  
376 longest measuring 385,133 bp. The number of mono-exonic genes (941,659) was almost twice as  
377 large as the total number of multi-exonic gene models (518,886). Even with reasonable filters,  
378 the number of *ab initio* prediction of mono-exonic genes was highly inflated. Therefore, the  
379 mono-exonic *ab initio* genes were removed from the gene space. The *ab initio* gene space was  
380 expanded by the addition of 14,538 well aligned unique transcriptome sequences of which 6,982  
381 are mono-exonic and the remaining 7,556 are multi-exonic. After filtering, annotation yielded  
382 37,936 high quality gene models. The average CDS length increased to 1,083 bp. The proportion

383 of mono-exonics (5,163) to multi-exonics (32,773) was drastically reduced using the  
384 transcriptome as an evidence source. Long introns were maintained, with the max intron length  
385 in the high quality set reaching nearly 1.4 Mb.

386 Of the 37,936 high quality gene models, 35,183 were functionally annotated by either  
387 sequence similarity search or gene family assignment with EnTAP. These functionally annotated  
388 gene models include the longest plant intron found so far, at 1.4 Mb. Large introns are  
389 characteristic of conifer genomes, with introns up to 800 Kbp observed in *Pinus taeda* (Wegrzyn  
390 et al., 2014) and introns over 500 Kbp in *Pinus lambertiana* (Stevens et al., 2016).

391 Functional annotation of the gene containing the 1.4 Mb long intron suggests it is a  
392 member of the WASP (Wiskott-Aldrich syndrome protein) family. Wiskott-Aldrich syndrome  
393 proteins are in turn members of the SCAR/WAVE (suppressor of cAMP receptor/WASP family  
394 verprolin homologous) gene regulatory complex, which in plants has an important role in cell  
395 morphogenesis via activation of actin filament proteins (Yanagisawa, Zhang, and Szymanski,  
396 2013).

397 Distribution of the high-quality gene models spanned the length of all 11 chromosomes  
398 (Figure 2). Repeat density varied across the chromosomes, including overlap with annotated  
399 regions.

#### 400 401 *Assessing annotation completeness*

402 Completeness of the annotation was assessed with BUSCO (Table 4). The independent  
403 transcriptome completeness of 79% represents the maximum possible BUSCO score for the gene  
404 model sets. The BUSCO completeness of the final high-quality gene set was 53%, comparable to  
405 the same metric in *Pinus taeda* (53%, Wegrzyn et al., 2014) and *Pinus lambertiana* (50%,

406 Stevens et al., 2016), suggesting the annotation of giant sequoia is on par with other conifer  
407 genomes.

408

#### 409 *Comparison to existing gymnosperm annotations*

410 While the genome size of giant sequoia is rather small for a gymnosperm (Table 5), the identified  
411 repeat content of giant sequoia 2.0 (79%) is in line with observations from other taxa. The  
412 number of high quality annotated genes (37,936) is higher than many gymnosperm assemblies,  
413 though there is substantial variation in annotation results across the lineage. Average CDS  
414 length and average intron length in giant sequoia 2.0 fall within the observed ranges for existing  
415 assemblies, though notably the longest intron reported here is ~1.4 Mb, nearly 400kb longer  
416 than the previous longest intron (from *Pinus taeda*, at over 800 kbp). That giant sequoia 2.0  
417 contains an even longer intron is likely due to the contiguity of our assembly, which is  
418 unprecedented in conifers.

419

#### 420 *Orthology assignment and gene family evolution*

421 Using unigene sets from TreeGenes, twenty gymnosperm taxa passed the 60% threshold  
422 for BUSCO completeness (Table 7). Orthogroup clustering of 695,700 protein sequences from  
423 these twenty gymnosperms plus an outgroup (*Amborella trichopoda*) yielded a total of 44,797  
424 orthogroups (Supplementary Table S3). Only 206 were single-copy in all species, and 5,953  
425 orthogroups had representatives from each species. Overall, 6.5% of all protein sequences were  
426 in species-specific orthogroups. Of the species-specific orthogroups (12,121 in total), 607 were  
427 unique to giant sequoia (Table 8). Among the 607 giant sequoia-specific orthogroups, 536 were

428 functionally annotated with either gene family assignment (318) sequence similarity search (8) or  
429 both (536) (Supplementary Table S4).

430 Orthogroup assignments were used as branch labels on a rooted species tree to show gene  
431 family contraction and expansion. On branch is the number of families that experienced  
432 expansion (dark blue, above) or contraction (light blue, below) (see Figure 3). Giant sequoia  
433 (Segi) experienced an overall expansion, with 4,953 families expanding and 1,923 families  
434 contracting since the species last shared common ancestor with coast redwood (*Sequoia*  
435 *sempervirens*; Sese).

436 The expansions and contractions were further examined to identify nodes that  
437 experienced particularly rapid evolution. Many representatives of the Pinaceae have thousands of  
438 gene families that experienced rapid evolution since their lineages diverged (Figure 4). Along the  
439 branch to giant sequoia (Segi), 4,176 orthologous groups evolved rapidly. The majority of these  
440 4,176 orthogroups are moderately represented in the giant sequoia dataset (e.g. with two to four  
441 members in an orthogroup), while others contain dozens of paralogs, up to over a hundred  
442 orthogroup members. Extracting the longest sequence from each of these yielded functional  
443 annotation with EnTAP for 3,994 of the rapidly evolving orthogroups. Rapidly expanding  
444 families were associated with primarily metabolic processes (GO:0090304, GO:0006796,  
445 GO:0044267) and macromolecule synthesis (GO:0009059, GO:0034645), in addition to  
446 molecular functions including metal-ion binding (GO:0046872), purine nucleotide  
447 (GO:0017076) and nucleoside (GO:0001883) binding, and kinase activity (GO:0016301).  
448 Rapidly contracting families were associated with biological processes such as protein  
449 (GO:0036211) and macromolecule modification (GO:0043412

450 and metabolic processes (GO:0044267, GO:0006796), and molecular functions including purine  
451 binding with nucleotides (GO:0017076) and nucleosides (GO:0001883), and phosphotransferase  
452 activity (GO:0016773).

453  
454 *NLR genes in the giant sequoia genome*  
455 NLR proteins are structurally modular, typically containing an N-terminal coiled-coil (CC)  
456 domain, a Toll/interleukin-1 receptor (TIR) domain, or more rarely an RPW8-like CC domain; a  
457 conserved nucleotide binding domain (NB-ARC); and a C-terminal region comprising a variable  
458 number of leucine-rich repeats (LRRs) (Monteiro and Nishimura, 2018). NLR genes in giant  
459 sequoia 2.0 were identified by first running the genomic sequence through the NLR-Annotator  
460 pipeline (Steuernagel et al., 2018). Importantly, this pipeline does not require masking of  
461 repetitive regions and does not rely on gene model predictions. NLR-Annotator outputs are  
462 categorized as either ‘complete’ or ‘partial’ depending on whether all canonical domains  
463 (CC/TIR, NB-ARC, LRR) are present, and then further categorized as ‘pseudo-’ if a stop codon  
464 is predicted in any domain. All categorizations should be interpreted with care because the  
465 NLR-Annotator algorithm does not take intron/exon boundaries into account.

466 A total of 984 NLR genes were predicted by NLR-Annotator, of which 442 were  
467 identified as complete, 332 complete pseudo-, 88 partial, and 122 partial pseudo-. Seven hundred  
468 and twelve included intact NB-ARC domains with fewer than 50% gaps in the alignment.  
469 NLR-gene coordinates of all NLR gene sequences, and the relationships of the 712 based on an  
470 NB-ARC domain maximum likelihood tree are included in Supplementary Table S5, S6, and S7  
471 as well as Supplementary Figure S1. This number is roughly twice the number found in

472 cultivated rice (Zhou et al., 2004; Read et al., 2020) and is consistent with other conifers (Van  
473 Ghelder et al., 2019).

474 NLR-Annotator identifies all suspected NLR motif-encoding regions of the genome.  
475 This likely includes true pseudogenes or gene fragments, both of which are important from an  
476 evolutionary perspective, but do not reflect the functional NLR arsenal. The NLR-Annotator  
477 output was cross-referenced with the giant sequoia genome annotation to identify the NLR genes  
478 that are supported by the annotation and therefore likely part of this arsenal; we refer to these  
479 315 genes as consensus NLR genes. Of these, 211 were categorized by NLR-Annotator as  
480 complete, 65 as complete pseudo-, 29 as partial, and 10 as partial pseudo-. Two hundred and fifty  
481 seven of the 315 consensus NLR genes encode NB-ARC domains that met our criteria (see  
482 Methods); a maximum likelihood tree was generated using these domains (Figure 5).  
483 Coordinates of the genes and their NB-ARC sequences are included in Supplementary Table S5  
484 and S7. NLR-Annotator predicted, non-consensus NLR genes may represent genes missed by the  
485 annotation, pseudogenes, or false positives.

486 To investigate the evolution of NLR genes in giant sequoia, the list of consensus NLRs  
487 was compared with orthogroup assignments. Overall, consensus NLRs had membership in 63  
488 orthogroups. Assessing the change in orthogroup size along each branch of the phylogeny  
489 revealed rapid expansion in NLR-associated orthogroups across the tree (Figure 6). Along the  
490 branch leading to giant sequoia (Segi), 34 NLR orthogroups expanded rapidly. The shared  
491 ancestors of giant sequoia and its closest relative, coast redwood (Sese), experienced rapid  
492 expansion in 11 NLR orthogroups. After the divergence of the California redwoods, five  
493 additional NLR orthogroups rapidly expanded in coast redwood, compared to the 34 rapidly

494 expanding NLR orthogroups in giant sequoia. This pattern, a larger number of NLR orthogroups  
495 rapidly expanding in giant sequoia compared to coast redwood, is consistent with the numbers of  
496 all rapidly evolving orthogroups in each lineage (Figure 4).

497 While the shared and unique NLR orthogroups identified in giant sequoia, coast redwood,  
498 and their common ancestors are perhaps associated with the observed pest resilience in both  
499 species, further work will be necessary to fully characterize the evolutionary patterns and  
500 functional roles of NLR gene families in redwoods and conifers as a whole.

501

## 502 **SUMMARY AND CONCLUSIONS**

503 The high quality of this assembly demonstrates the value of combining multiple sequencing  
504 technologies and leveraging a unique biological feature of conifers (sufficient haploid  
505 megagametophyte tissue for sequencing), along with the value of incorporating  
506 chromosome-conformation capture libraries to allow improvements in scaffolding. The giant  
507 sequoia genome assembly presented here provides a robust foundation for ongoing genomic  
508 studies to identify groves with evidence of local adaptation, with a focus on not only NLR genes  
509 but the many other genes and gene families potentially useful in conservation and management.

510 For the future, inferences about the evolutionary trajectory of conifers (and  
511 gymnosperms) will require a broadening of taxonomic focus. As the vast majority of conifer  
512 genomic research is centered on Pinaceae, developing resources in understudied conifer families  
513 is essential for meaningful comparative genomic work that could further inform conservation and  
514 management for iconic species..

515

516  
517  
518  
519  
520  
521  
522  
523  
524  
525  
526  
527  
528  
529  
530  
531  
532

## ACKNOWLEDGEMENTS

This project was supported by a grant from Save The Redwoods League for the Redwood Genome Project (to DN), and by grants from the National Institute of Food and Agriculture of the U.S. Department of Agriculture (<http://nifa.usda.gov>; 2018-67011-28025 to AR and 2018-67015-28199 to AZ). Illumina and PacBio sequencing were carried out by the DNA Technologies and Expression Analysis Cores at the UC Davis Genome Center, supported by NIH Shared Instrumentation Grant 1S10OD010786-01. Part of this research project was conducted using computational resources at the Maryland Advanced Research Computing Center (MARCC) and at the Computational Biology Core, Institute for Systems Genomics, University of Connecticut. Professor Stephen C. Sillett and his group at Humboldt State University made this project possible by climbing SEGI 21 and obtaining cones and foliage for sequencing. Marc Crepeau's skill at megagametophyte dissection, DNA extraction, and library prep is well appreciated. Bill Libby provided valuable support for this project, in the form of scientific guidance and both enthusiasm and expertise in giant sequoia genetics. Thank you to Sequoia/Kings Canyon National Park for allowing us to conduct research inside the park.



533

534

## REFERENCES

535

536 Albert, V. A., Barbazuk, W. B., Depamphilis, C. W., Der, J. P., Leebens-Mack, J., Ma, H.,  
537 ... & Soltis, D. E. (2013). The Amborella genome and the evolution of flowering  
538 plants. *Science*, 342(6165), 1241089.

539

540 Benson G. Tandem repeats finder: a program to analyze DNA sequences. *Nucleic acids*  
541 *research*. 1999;27(2):573-80

542

543 Buchholz, J. T. (1939). The generic segregation of the sequoias. *American Journal of*  
544 *Botany*, 26(7), 535-538.

545

546 Burns, E.B., Campbell, R., & Cowan, P.D. (2018). State of Redwoods Conservation  
547 Report.

548

549 Bush, S.J., Castillo-Morales, A., Tovar-Corona, J.M., Chen, L., Kover, P.X., and Urrutia,  
550 A.O. (2013). Presence–absence variation in *A. thaliana* is primarily associated with  
551 genomic signatures consistent with relaxed selective constraints. *Mol. Biol. Evol.* 31,  
552 59-69.

553 Caballero, M., & Wegrzyn, J. (2019). gFACs: Gene Filtering, Analysis, and Conversion  
554 to Unify Genome Annotations Across Alignment and Gene Prediction  
555 Frameworks. *Genomics, proteomics & bioinformatics*, 17(3), 305-310.  
556

557 Cook, L.F. (1961) The Giant Sequoias of California.

558 DeSilva, R., & Dodd, R. (2014). Development and characterization of microsatellite  
559 markers for giant sequoia, *Sequoiadendron giganteum* (Cupressaceae). *Conservation*  
560 *genetics resources*, 6(1), 173-174.  
561

562 Dodd, R. S., & DeSilva, R. (2016). Long-term demographic decline and late glacial  
563 divergence in a Californian paleoendemic: *Sequoiadendron giganteum* (giant  
564 sequoia). *Ecology and evolution*, 6(10), 3342-3355.  
565

566 Douglass, A. E. (1919). *Climatic cycles and tree-growth* (Vol. 289). Carnegie Institution  
567 of Washington.

568 Elliott-Fisk, D.L., Stephens, S.L., Aubert, J.E., Murphy, D., Schaber, J. “Mediated  
569 Settlement Agreement for Sequoia National Forest, Section B. Giant Sequoia Groves: an  
570 evaluation.” In *Sierra Nevada Ecosystem Project: Final report to Congress: status of the*  
571 *Sierra Nevada*. Davis, CA: Centers for Water and Wildland Resources, University of  
572 California, 1997.

573 Emms, D. M., & Kelly, S. (2015). OrthoFinder: solving fundamental biases in whole  
574 genome comparisons dramatically improves orthogroup inference accuracy. *Genome*  
575 *biology*, 16(1), 157.

576  
577 Emms, D. M., & Kelly, S. (2019). OrthoFinder: phylogenetic orthology inference for  
578 comparative genomics. *Genome biology*, 20(1), 1-14.

579  
580 Falk T., Herndon N., Grau E., Buehler S., Richter P., Zaman S., Baker E.M., Ramnath R.,  
581 Ficklin S., Staton M., Feltus F.A., Jung S., Main D., Wegrzyn J.L. (2018). Growing and  
582 cultivating the forest genomics database, TreeGenes. Database, Volume 2018  
583 doi:10.1093/database/bay084

584  
585 Fins, L., & Libby, W. J. (1982). Population variation in *Sequoiadendron*: seed and  
586 seedling studies, vegetative propagation, and isozyme variation. *Silvae Genet*, 31(4),  
587 102-110.

588  
589 G. Gremme, V. Brendel, M.E. Sparks, and S. Kurtz. Engineering a software tool for gene  
590 structure prediction in higher organisms. *Information and Software Technology*,  
591 47(15):965-978, 2005

592  
593 Garrison E, Marth G. Haplotype-based variant detection from short-read sequencing.  
594 arXiv preprint arXiv:1207.3907 [q-bio.GN] 2012

- 595 Guan, R., Zhao, Y., Zhang, H., Fan, G., Liu, X., Zhou, W., ... & Fu, Y. (2016). Draft  
596 genome of the living fossil Ginkgo biloba. *Gigascience*, 5(1), s13742-016.  
597
- 598 Han, M. V., Thomas, G. W., Lugo-Martinez, J., & Hahn, M. W. (2013). Estimating gene  
599 gain and loss rates in the presence of error in genome assembly and annotation using  
600 CAFE 3. *Molecular biology and evolution*, 30(8), 1987-1997.  
601
- 602 Hart, A. J., Ginzburg, S., Xu, M., Fisher, C. R., Rahmatpour, N., Mitton, J. B., ... &  
603 Wegrzyn, J. L. (2019). EnTAP: bringing faster and smarter functional annotation to  
604 non-model eukaryotic transcriptomes. *Molecular Ecology Resources*.  
605
- 606 Hizume, M., Kondo, T., Shibata, F., & Ishizuka, R. (2001). Flow cytometric  
607 determination of genome size in the Taxodiaceae, Cupressaceae sensu stricto and  
608 Sciadopityaceae. *Cytologia*, 66(3), 307-311.  
609
- 610 Hoff, K.J., Lange, S., Lomsadze, A., Borodovsky, M. and Stanke, M. (2015). BRAKER1:  
611 unsupervised RNA-Seq-based genome annotation with GeneMark-ET and AUGUSTUS.  
*Bioinformatics*, 32(5):767-769.
- 612 Hoff, K.J., Lomsadze, A., Borodovsky, M. and Stanke, M. (2019). Whole-Genome  
613 Annotation with BRAKER. *Methods Mol Biol*. 1962:65-95, doi:  
614 10.1007/978-1-4939-9173-0\_5.

615 Howe KL, Contreras-Moreira B, De Silva N, Maslen G, Akanni W, Allen J,  
616 Alvarez-Jarreta J, Barba M, Bolser DM, Cambell L, Carbajo M, Chakiachvili M,  
617 Christensen M, Cummins C, Cuzick A, Davis P, Fexova S, Gall A, George N, Gil L,  
618 Gupta P, Hammond-Kosack KE, Haskell E, Hunt SE, Jaiswal P, Janacek SH, Kersey PJ,  
619 Langridge N, Maheswari U, Maurel T, McDowall MD, Moore B, Muffato M, Naamati G,  
620 Naithani S, Olson A, Papatheodorou I, Patricio M, Paulini M, Pedro H, Perry E, Preece J,  
621 Rosello M, Russell M, Sitnik V, Staines DM, Stein J, Tello-Ruiz MK, Trevanion SJ,  
622 Urban M, Wei S, Ware D, Williams G, Yates AD, Flicek P. Ensembl Genomes  
623 2020-enabling non-vertebrate genomic research. *Nucleic Acids Research* 2019  
624  
625 Jensen, H., & Levan, A. (1941). Colchicine-induced tetraploidy in *Sequoia*  
626 *gigantea*. *Hereditas*, 27(3-4), 220-224.  
627  
628 Jones, P., Binns, D., Chang, H. Y., Fraser, M., Li, W., McAnulla, C., ... & Pesseat, S.  
629 (2014). InterProScan 5: genome-scale protein function  
630 classification. *Bioinformatics*, 30(9), 1236-1240.  
631  
632 Jupe, F., Pritchard, L., Etherington, G.J., Mackenzie, K., Cock, P.J., Wright, F., Sharma,  
633 S.K., Bolser, D., Bryan, G.J., Jones, J.D., and Hein, I. (2012). Identification and  
634 localisation of the NB-LRR gene family within the potato genome. *BMC Genomics* 13,  
635 75. PMC3297505: 22336098.

- 636 Kim D, Langmead B, and Salzber SL. HISAT: a fast spliced aligner with low memory  
637 requirements. *Nature Methods* 2015.
- 638 Leslie, A. B., Beaulieu, J., Holman, G., Campbell, C. S., Mei, W., Raubeson, L. R., &  
639 Mathews, S. (2018). An overview of extant conifer evolution from the perspective of the  
640 fossil record. *American journal of botany*, 105(9), 1531-1544.
- 641
- 642 Letunic, I., and Bork, P. (2016). Interactive tree of life (iTOL) v3: an online tool for the  
643 display and annotation of phylogenetic and other trees. *Nucleic Acids Res.* 44,  
644 W242-W245. PMC4987883: 27095192.
- 645
- 646 Li, H. (2018). Minimap2: pairwise alignment for nucleotide  
647 sequences. *Bioinformatics*, 34:3094-3100. doi:10.1093/bioinformatics/bty191
- 648 Li H. (2013) Aligning sequence reads, clone sequences and assembly contigs with  
649 BWA-MEM. arXiv:1303.3997v1 [q-bio.GN]
- 650
- 651 Marçais G, Kingsford C. A fast, lock-free approach for efficient parallel counting of  
652 occurrences of k-mers. *Bioinformatics*. 2011 Mar 15;27(6):764-70.
- 653
- 654 Monteiro, F., and Nishimura, M.T. (2018). Structural, functional, and genomic diversity  
655 of plant NLR proteins: an evolved resource for rational engineering of plant immunity.  
656 *Annu. Rev. Phytopathol.* 56, 243-267. 29949721.

657  
658 Mosca, E., Cruz, F., Gómez-Garrido, J., Bianco, L., Rellstab, C., Brodbeck, S., ... &  
659 Gömöry, D. (2019). A reference genome sequence for the european silver fir (*abies alba*  
660 mill.): a community-generated genomic resource. *G3: Genes, Genomes, Genetics*, 9(7),  
661 2039-2049.

662  
663 Neale, D. B., McGuire, P. E., Wheeler, N. C., Stevens, K. A., Crepeau, M. W., Cardeno,  
664 C., ... & Casola, C. (2017). The Douglas-fir genome sequence reveals specialization of  
665 the photosynthetic apparatus in Pinaceae. *G3: Genes, Genomes, Genetics*, 7(9),  
666 3157-3167.

667  
668 Neale, D.B., Wegrzyn, J.L., Stevens, K.A. *et al.* Decoding the massive genome of  
669 loblolly pine using haploid DNA and novel assembly strategies. *Genome Biol* **15**, R59  
670 (2014). <https://doi.org/10.1186/gb-2014-15-3-r59>

671  
672 Neale DB, Wegrzyn JL, Stevens KA, Zimin AV, Puiu D, Crepeau MW, Cardeno C,  
673 Koriabine M, Holtz-Morris AE, Liechty JD, Martínez-García PJ. Decoding the massive  
674 genome of loblolly pine using haploid DNA and novel assembly strategies. *Genome*  
675 *biology*. 2014 Mar;15(3):R59.

676  
677 O'Leary NA, Wright MW, Brister JR, Ciuffo S, Haddad D, McVeigh R, Rajput B,  
678 Robbertse B, Smith-White B, Ako-Adjei D, Astashyn A, Badretdin A, Bao Y, Blinkova

679 O, Brover V, Chetvernin V, Choi J, Cox E, Ermolaeva O, Farrell CM, Goldfarb T, Gupta  
680 T, Haft D, Hatcher E, Hlavina W, Joardar VS, Kodali VK, Li W, Maglott D, Masterson P,  
681 McGarvey KM, Murphy MR, O'Neill K, Pujar S, Rangwala SH, Rausch D, Riddick LD,  
682 Schoch C, Shkeda A, Storz SS, Sun H, Thibaud-Nissen F, Tolstoy I, Tully RE, Vatsan  
683 AR, Wallin C, Webb D, Wu W, Landrum MJ, Kimchi A, Tatusova T, DiCuccio M, Kitts  
684 P, Murphy TD, Pruitt KD. Reference sequence (RefSeq) database at NCBI: current status,  
685 taxonomic expansion, and functional annotation. *Nucleic Acids Res.* 2016 Jan  
686 44(D1):D733-45.

687

688 Putnam NH, O'Connell BL, Stites JC, Rice BJ, Blanchette M, Calef R, Troll CJ, Fields A,  
689 Hartley PD, Sugnet CW, Haussler D. Chromosome-scale shotgun assembly using an in  
690 vitro method for long-range linkage. *Genome research.* 2016 Mar 1;26(3):342-50.

691

692 Quinlan, A. R., & Hall, I. M. (2010). BEDTools: a flexible suite of utilities for comparing  
693 genomic features. *Bioinformatics*, 26(6), 841-842.

694

695 Read, A.C., Moscou, M.J., Zimin, A.V., Pertea, G., Meyer, R.S., Purugganan, M.D.,  
696 Leach, J.E., Triplett, L.R., Salzberg, S.L., and Bogdanove, A.J. (2020). Genome assembly  
697 and characterization of a complex zFBED-NLR gene-containing disease resistance locus  
698 in Carolina Gold Select rice with Nanopore sequencing. *PLoS Genet.* 16, e1008571.  
699 31986137.

700



701 Schatz, M.C., Maron, L.G., Stein, J.C., Wences, A.H., Gurtowski, J., Biggers, E., Lee, H.,  
702 Kramer, M., Antoniou, E., Ghiban, E., Wright, M.H., Chia, J.-m., Ware, D., McCouch,  
703 S.R., and McCombie, W.R. (2014). Whole genome de novo assemblies of three divergent  
704 strains of rice, *Oryza sativa*, document novel gene space of aus and indica. *Genome Biol.*  
705 15, 506.

706  
707 Schlarbaum, S. E., & Tsuchiya, T. (1984). Cytotaxonomy and phylogeny in certain  
708 species of Taxodiaceae. *Plant systematics and evolution*, 147(1-2), 29-54.

709  
710 Schmid, R. & Farjon, A. 2013. *Sequoiadendron giganteum* . *The IUCN Red List of*  
711 *Threatened Species* 2013:  
712 e.T34023A2840676. <https://dx.doi.org/10.2305/IUCN.UK.2013-1.RLTS.T34023A28406>  
713 76.en. Downloaded on 25 January 2020.

714  
715 Scott, A. D., Stenz, N. W., Ingvarsson, P. K., & Baum, D. A. (2016). Whole genome  
716 duplication in coast redwood (*Sequoia sempervirens*) and its implications for explaining  
717 the rarity of polyploidy in conifers. *New Phytologist*, 211(1), 186-193.

718  
719 Sillett, S. C., Van Pelt, R., Carroll, A. L., Kramer, R. D., Ambrose, A. R., & Trask, D. A.  
720 (2015). How do tree structure and old age affect growth potential of California  
721 redwoods?. *Ecological Monographs*, 85(2), 181-212.

722

723 Simão FA, Waterhouse RM, Ioannidis P, Kriventseva EV, Zdobnov EM. BUSCO:  
724 assessing genome assembly and annotation completeness with single-copy orthologs.  
725 *Bioinformatics*. 2015 Oct 1;31(19):3210-2.  
726 Smit, AFA, Hubley, R. *RepeatModeler Open-1.0*.  
727 2008-2015 <<http://www.repeatmasker.org>>.  
728  
729 Smit, AFA, Hubley, R & Green, P. *RepeatMasker Open-4.0*.  
730 2013-2015 <<http://www.repeatmasker.org>>.  
731  
732 Stahl, E., Hilfiker, O., and Reymond, P. (2018). Plant-arthropod interactions: who is the  
733 winner? *Plant J*. 93, 703-728. 29160609.  
734  
735 Stamatakis, A. (2014). RAxML version 8: a tool for phylogenetic analysis and  
736 post-analysis of large phylogenies. *Bioinformatics* 30, 1312-1313. PMC3998144:  
737 24451623.  
738  
739 Stanke, M., Diekhans, M., Baertsch, R. and Haussler, D. (2008). Using native and  
740 syntenically mapped cDNA alignments to improve de novo gene finding. *Bioinformatics*,  
741 doi: 10.1093/bioinformatics/btn013.  
742  
743 Stanke. M., Schöffmann, O., Morgenstern, B. and Waack, S. (2006). Gene prediction in  
744 eukaryotes with a generalized hidden Markov model that uses hints from external  
745 sources. *BMC Bioinformatics* 7, 62.

744 Stephenson, N. L., Das, A. J., Amperssee, N. J., Cahill, K. G., Caprio, A. C., Sanders, J.  
745 E., & Williams, A. P. (2018). Patterns and correlates of giant sequoia foliage dieback  
746 during California's 2012–2016 hotter drought. *Forest ecology and management*, 419,  
747 268-278.

748

749 Stephenson, N. L. (1994, July). Long-term dynamics of giant sequoia populations:  
750 implications for managing a pioneer species. In *Proceedings of the symposium on giant*  
751 *sequoias: Their place in the ecosystem and society'*.(Tech. coord. P Aune) pp (pp. 56-63).

752

753 Steuernagel, B., Witek, K., Krattinger, S.G., Ramirez-Gonzalez, R.H., Schoonbeek, H.-j.,  
754 Yu, G., Baggs, E., Witek, A.I., Yadav, I., Krasileva, K.V., Jones, J.D.G., Uauy, C., Keller,  
755 B., Ridout, C.J., and Wulff, B.B.H. (2018). Physical and transcriptional organisation of  
756 the bread wheat intracellular immune receptor repertoire. *bioRxiv*, 339424.

757

758 Stevens, K. A., Wegrzyn, J. L., Zimin, A., Puiu, D., Crepeau, M., Cardeno, C., ... &  
759 Martínez-García, P. J. (2016). Sequence of the sugar pine megagenome. *Genetics*, 204(4),  
760 1613-1626.

761

762 The UniProt Consortium. (2019) UniProt: a worldwide hub of protein knowledge.  
763 *Nucleic Acids Res.* 47: D506-515.

764

765 Van Ghelder, C., Parent, G.J., Rigault, P., Prunier, J., Giguere, I., Caron, S., Stival Sena,  
766 J., Deslauriers, A., Bousquet, J., Esmenjaud, D., and MacKay, J. (2019). The large  
767 repertoire of conifer NLR resistance genes includes drought responsive and highly  
768 diversified RNLs. *Sci Rep* 9, 11614. PMC6691002: 31406137.

769

770 Wan, T., Liu, Z. M., Li, L. F., Leitch, A. R., Leitch, I. J., Lohaus, R., ... & Wang, W. C.  
771 (2018). A genome for gnetophytes and early evolution of seed plants. *Nature Plants*, 4(2),  
772 82-89.

773

774 Warren, R. L., Keeling, C. I., Yuen, M. M. S., Raymond, A., Taylor, G. A., Vandervalk,  
775 B. P., ... & Robertson, G. (2015). Improved white spruce (*Picea glauca*) genome  
776 assemblies and annotation of large gene families of conifer terpenoid and phenolic  
777 defense metabolism. *The Plant Journal*, 83(2), 189-212.

778

779 Wegrzyn, J. L., Liechty, J. D., Stevens, K. A., Wu, L. S., Loopstra, C. A., Vasquez-Gross,  
780 H. A., ... & Holt, C. (2014). Unique features of the loblolly pine (*Pinus taeda* L.)  
781 megagenome revealed through sequence annotation. *Genetics*, 196(3), 891-909.

782

783 Wegrzyn J.L., Staton M.A., Street N. R., Main D., Grau E., Herndon N., Buehler S., Falk  
784 T., Zaman S., Ramnath R., Richter P., Sun L., Condon B., Almsaeed A., Chen  
785 M.,Mannapperuma C., Jung S., Ficklin S. Cyberinfrastructure to Improve Forest Health

786 and Productivity: The Role of Tree Databases in Connecting Genomes, Phenomes, and  
787 the Environment, *TreeGenes. Database*, Volume 2019. doi:10.3389/fpls.2019.00813

788

789 Wu, T. D., & Watanabe, C. K. (2005). GMAP: a genomic mapping and alignment  
790 program for mRNA and EST sequences. *Bioinformatics*, *21*(9), 1859-1875.

791

792 Wu, T. D., & Nacu, S. (2010). Fast and SNP-tolerant detection of complex variants and  
793 splicing in short reads. *Bioinformatics*, *26*(7), 873-881.

794

795 Xu, X., Liu, X., Ge, S., Jensen, J.D., Hu, F., Li, X., Dong, Y., Gutenkunst, R.N., Fang, L.,  
796 Huang, L., Li, J., He, W., Zhang, G., Zheng, X., Zhang, F., Li, Y., Yu, C., Kristiansen, K.,  
797 Zhang, X., Wang, J., Wright, M., McCouch, S., Nielsen, R., Wang, J., and Wang, W.  
798 (2012). Resequencing 50 accessions of cultivated and wild rice yields markers for  
799 identifying agronomically important genes. *Nat. Biotechnol.* *30*, 105-111.

800

801 Yanagisawa, M., Zhang, C., & Szymanski, D. B. (2013). ARP2/3-dependent growth in  
802 the plant kingdom: SCARs for life. *Frontiers in Plant Science*, *4*, 166.

803

804 Y. Zhang, Y. Zhang, J. M. Burke, K. Gleitsman, S. M. Friedrich, K. J. Liu, and T. H.  
805 Wang, A Simple Thermoplastic Substrate Containing Hierarchical Silica Lamellae for  
806 High-Molecular-Weight DNA Extraction. *Adv Mater* (2016). PubMed PMID: 27862402

807

808 Yi, F., Ling, J., Xiao, Y., Zhang, H., Ouyang, F., & Wang, J. (2018). ConTEdb: a  
809 comprehensive database of transposable elements in conifers. Database, 2018.  
810

811 Yu, P., Wang, C., Xu, Q., Feng, Y., Yuan, X., Yu, H., Wang, Y., Tang, S., and Wei, X.  
812 (2011). Detection of copy number variations in rice using array-based comparative  
813 genomic hybridization. *BMC Genomics* 12, 372. PMC3156786: 21771342.  
814

815 Zhang M, Zhang Y, Scheuring CF, Wu CC, Dong JJ, Zhang H Bin. 2012. Preparation of  
816 megabase-sized DNA from a variety of organisms using the nuclei method for advanced  
817 genomics research. *Nat Protoc* 7: 467–478.  
818

819 Zheng, L.-Y., Guo, X.-S., He, B., Sun, L.-J., Peng, Y., Dong, S.-S., Liu, T.-F., Jiang, S.,  
820 Ramachandran, S., and Liu, C.-M. (2011). Genome-wide patterns of genetic variation in  
821 sweet and grain sorghum (*Sorghum bicolor*). *Genome Biol.* 12, R114.  
822

823 Zhou, T., Wang, Y., Chen, J.-Q., Araki, H., Jing, Z., Jiang, K., Shen, J., and Tian, D.  
824 (2004). Genome-wide identification of NBS genes in japonica rice reveals significant  
825 expansion of divergent non-TIR NBS-LRR genes. *Mol. Genet. Genomics* 271, 402-415.  
826

827 Zimin A, Stevens KA, Crepeau MW, Holtz-Morris A, Koriabine M, Marçais G, Puiu D,  
828 Roberts M, Wegrzyn JL, de Jong PJ, Neale DB. Sequencing and assembly of the 22-Gb  
829 loblolly pine genome. *Genetics*. 2014 Mar 1;196(3):875-90.

830

831 Zimin AV, Marçais G, Puiu D, Roberts M, Salzberg SL, Yorke JA. The MaSuRCA  
832 genome assembler. *Bioinformatics*. 2013 Aug 29;29(21):2669-77.

833

834 Zimin AV, Puiu D, Luo MC, Zhu T, Koren S, Marçais G, Yorke JA, Dvořák J, Salzberg  
835 SL. Hybrid assembly of the large and highly repetitive genome of *Aegilops tauschii*, a  
836 progenitor of bread wheat, with the MaSuRCA mega-reads algorithm. *Genome research*.  
837 2017 May 1;27(5):787-92.

838

839

840

841

842

| Table 1. Data used for the giant sequoia assemblies from four library types. |                 |                          |                    |
|------------------------------------------------------------------------------|-----------------|--------------------------|--------------------|
| Type                                                                         | Number of reads | Average read length (bp) | Estimated coverage |
| Illumina paired end                                                          | 7,752,481,576   | 2x151                    | 135x               |
| Oxford Nanopore MinION                                                       | 24,360,895      | 7,484                    | 21x                |
| Dovetail Chicago                                                             | 2,592,465,290   | 2x151                    | 47x                |
| Dovetail Hi-C                                                                | 4,202,954,328   | 2x151                    | 76x                |



Table 2. Assembly statistics for the initial contig assembly giant sequoia 1.0 and the final scaffolded assembly giant sequoia 2.0.

| Assembly          | Sequence (bp) | N50 contig | N50 scaffold | Number of contigs | Number of scaffolds |
|-------------------|---------------|------------|--------------|-------------------|---------------------|
| Giant sequoia 1.0 | 8,122,145,191 | 347,954    | 490,521      | 49,651            | 39,821              |
| Giant sequoia 2.0 | 8,125,622,286 | 347,954    | 690,549,816  | 52,886            | 8,125               |

Table 3. Summary of largest scaffolds in giant sequoia 2.0 and presence of centromeric and telomeric repeat regions

| Scaffold ID  | Length (bp) | Centromere? | Number of telomeres |
|--------------|-------------|-------------|---------------------|
| chr1         | 986,618,365 | Y           | 1                   |
| chr2         | 873,713,311 | Y           | 2                   |
| chr3         | 843,110,718 | Y           | 1                   |
| chr4         | 722,823,090 | Y           | 2                   |
| chr5         | 690,549,816 | Y           | 2                   |
| chr6         | 676,903,824 | Y           | 1                   |
| chr7         | 659,235,867 | Y           | 2                   |
| chr8         | 649,867,199 | Y           | 2                   |
| chr9         | 641,211,466 | Y           | 1                   |
| chr10        | 632,191,860 | Y           | 2                   |
| chr11        | 443,565,592 | Y           | 2                   |
| Sc7zsyj_3574 | 171,454,409 | N           | 1                   |

Table 4. Completeness of assembly and gene sets assessed with BUSCOv3.0.2.

|                                        | <b>Giant sequoia v2.0</b> | <b>Giant sequoia v2.0<br/>(≥3kbp)</b> | <b>Transcriptome</b> | <b>High-confidence<br/>gene set</b> |
|----------------------------------------|---------------------------|---------------------------------------|----------------------|-------------------------------------|
| Number of input sequences              | 8215                      | 8120                                  | 25859                | 37936                               |
| Complete BUSCOs (C)                    | 559                       | 553                                   | 1139                 | 766                                 |
| Complete and single-copy<br>BUSCOs (S) | 515                       | 508                                   | 1076                 | 683                                 |
| Complete and duplicated<br>BUSCOs (D)  | 44                        | 45                                    | 63                   | 83                                  |
| Fragmented BUSCOs (F)                  | 133                       | 131                                   | 66                   | 149                                 |
| Missing BUSCOs (M)                     | 748                       | 756                                   | 235                  | 525                                 |
| Total BUSCO groups<br>searched         | 1440                      | 1440                                  | 1440                 | 1440                                |
| Percentage found                       | 38.82%                    | 38.40%                                | 79.10%               | 53.19%                              |

Table 5. Comparison of giant sequoia v2.0 assembly and annotation to selected gymnosperm genome projects. 5a shows assembly statistics as reported in referenced manuscripts. 5b shows annotation statistics as calculated using gFACs on most recent annotations available at TreeGenes. Annotation statistics for *Picea glauca* are reported as in referenced manuscript.

| 5a                               | <i>Sequoiadendron giganteum</i> | <i>Abies alba</i>  | <i>Picea glauca</i> | <i>Pinus lambertiana</i> | <i>Pinus taeda</i> | <i>Pseudotsuga menzesii</i> | <i>Ginkgo biloba</i> | <i>Gnetum montanum</i> |
|----------------------------------|---------------------------------|--------------------|---------------------|--------------------------|--------------------|-----------------------------|----------------------|------------------------|
| Reference                        |                                 | Mosca et al., 2019 | Warren et al., 2015 | Stevens et al., 2016     | Neale et al., 2014 | Neale et al., 2017          | Guan et al., 2016    | Wan et al., 2018       |
| Genome size (Mbp)                | 8,114                           | 18,167             | 20,000              | 31,000                   | 20,613             | 15,700                      | 10,610               | 4,110                  |
| Chromosomes                      | 11                              | 12                 | 12                  | 12                       | 12                 | 12                          | 12                   | 22                     |
| TE content (%)                   | 79                              | 78                 | N/A                 | 79                       | 81                 | 72                          | 77                   | 86                     |
| N50 scaffold size (kb)           | 690,549.82                      | 14.05              | 71.50               | 246.60                   | 107.04             | 340.70                      | 1,360.00             | 475.17                 |
|                                  |                                 |                    |                     |                          |                    |                             |                      |                        |
| 5b                               | <i>Sequoiadendron giganteum</i> | <i>Abies alba</i>  | <i>Picea glauca</i> | <i>Pinus lambertiana</i> | <i>Pinus taeda</i> | <i>Pseudotsuga menzesii</i> | <i>Ginkgo biloba</i> | <i>Gnetum montanum</i> |
| Number of genes                  | 37,936                          | 94,209             | 14,462              | 38,518                   | 51,751             | 46,688                      | 41,840               | 27,493                 |
| Average overall CDS size         | 1,084                           | 629                | 1,421               | 1,102                    | 1,131              | 1,180                       | 1,186                | 1,290                  |
| Average size multiexonic introns | 4,067                           | 315                | 603                 | 11,468                   | 5,596              | 4,685                       | 7,884                | 1,769                  |
| Maximum intron length (kb)       | 1,399.11                        | 36.01              | 119.32              | 1,254.69                 | 758.52             | 351.90                      | 1,272.92             | 342.13                 |

Table 6: Gene models proposed by BRAKER2, before and after filtering. Intermediate set was filtered by removing monoexonic models, models with greater than 50% of their length in a masked region, models annotated as retrodomains, and models lacking functional annotation with EnTAP. The high-confidence set includes the intermediate set, plus mono- and multi-exonic models derived from transcript evidence, removing any fully nested gene models.

|                            | <b>Initial model set</b> | <b>Intermediate filtered set</b> | <b>High-confidence set</b> |
|----------------------------|--------------------------|----------------------------------|----------------------------|
| Total Genes                | 1,460,545                | 32,360                           | 37,936                     |
| Average CDS length         | 613.90                   | 1099.08                          | 1083.00                    |
| Average number of exons    | 2.78                     | 4.22                             | 4.5                        |
| Average intron length (bp) | 2,362                    | 2,233                            | 4,066                      |
| Max intron length          | 385,133                  | 159,979                          | 1,399,110                  |
| Total monoexonics          | 941,659                  | -                                | 5,163                      |
| Total multiexonics         | 518,886                  | 32,360                           | 32,773                     |

Table 7. BUSCO completeness for 20 gymnosperm taxa and an angiosperm outgroup (*Amborella trichopoda*)

| TreeGenes code             | Abba                  | Gibi                         | Gnmo                 | Megl                                | Pama                 | Pial                    | Piba                   |
|----------------------------|-----------------------|------------------------------|----------------------|-------------------------------------|----------------------|-------------------------|------------------------|
| taxon                      | <i>Abies balsamea</i> | <i>Ginkgo biloba</i>         | <i>Gnetum gnemon</i> | <i>Metasequoia glyptostroboides</i> | <i>Picea mariana</i> | <i>Pinus albicaulis</i> | <i>Pinus banksiana</i> |
|                            | Balsam fir            | Ginkgo                       | Gnemon/milinjo       | Dawn redwood                        | Black spruce         | White pine              | Jack pine              |
| Unigene set                |                       |                              |                      |                                     |                      |                         |                        |
| Data source(s)             | transcriptome         | annotation,<br>transcriptome | annotation           | transcriptome                       | transcriptome        | transcriptome           | transcriptome          |
| Number of unigenes         | 21,250                | 110,296                      | 21,887               | 19,237                              | 22,876               | 27,226                  | 21,278                 |
| Average length of unigenes | 396.46                | 269.39                       | 351.69               | 343.17                              | 376.93               | 338.76                  | 381.58                 |
| <b>BUSCOv4.0.2</b>         |                       |                              |                      |                                     |                      |                         |                        |
| Complete                   | 1419                  | 1437                         | 1301                 | 1109                                | 1429                 | 1453                    | 1342                   |
| Complete & single copy     | 1357                  | 1292                         | 1265                 | 1068                                | 1377                 | 1398                    | 1283                   |
| Complete & duplicated      | 62                    | 145                          | 36                   | 41                                  | 52                   | 55                      | 59                     |
| Fragmented                 | 52                    | 89                           | 82                   | 206                                 | 66                   | 48                      | 93                     |
| Missing                    | 143                   | 88                           | 231                  | 299                                 | 119                  | 113                     | 179                    |
| Total searched             | 1614                  | 1614                         | 1614                 | 1614                                | 1614                 | 1614                    | 1614                   |
| % complete                 | 87.92%                | 89.03%                       | 80.61%               | 68.71%                              | 88.54%               | 90.02%                  | 83.15%                 |

Table 7. BUSCO completeness for 20 gymnosperm taxa and an angiosperm outgroup (*Amborella trichopoda*)

| <b>TreeGenes code</b>      | <b>Pice</b>         | <b>Picn</b>              | <b>Pila</b>                  | <b>Pima</b>             | <b>Pimn</b>            | <b>Pipt</b>          | <b>Pist</b>          |
|----------------------------|---------------------|--------------------------|------------------------------|-------------------------|------------------------|----------------------|----------------------|
| <b>taxon</b>               | <i>Pinus cembra</i> | <i>Pinus canariensis</i> | <i>Pinus lambertiana</i>     | <i>Pinus massoniana</i> | <i>Pinus monticola</i> | <i>Pinus patula</i>  | <i>Pinus strobus</i> |
|                            | Swiss stone pine    | Canary island pine       | Sugar pine                   | Chinese red pine        | Western white pine     | Mexican weeping pine | Eastern white pine   |
| <b>Unigene set</b>         |                     |                          |                              |                         |                        |                      |                      |
| Data source(s)             | transcriptome       | transcriptome            | annotation,<br>transcriptome | transcriptome           | transcriptome          | transcriptome        | transcriptome        |
| Number of unigenes         | 17,994              | 22,631                   | 42,256                       | 33,891                  | 17,447                 | 46,563               | 21,697               |
| Average length of unigenes | 411.38              | 327.27                   | 357.80                       | 322.13                  | 388.92                 | 348.04               | 372.89               |
| <b>BUSCOv4.0.2</b>         |                     |                          |                              |                         |                        |                      |                      |
| Complete                   | 1300                | 1183                     | 1369                         | 1415                    | 1202                   | 1526                 | 1338                 |
| Complete & single copy     | 1250                | 1147                     | 1276                         | 1367                    | 1163                   | 1435                 | 1296                 |
| Complete & duplicated      | 50                  | 36                       | 93                           | 48                      | 39                     | 91                   | 42                   |
| Fragmented                 | 119                 | 226                      | 88                           | 84                      | 146                    | 28                   | 95                   |
| Missing                    | 195                 | 205                      | 157                          | 115                     | 266                    | 60                   | 181                  |
| Total searched             | 1614                | 1614                     | 1614                         | 1614                    | 1614                   | 1614                 | 1614                 |
| % complete                 | 80.55%              | 73.30%                   | 84.82%                       | 87.67%                  | 74.47%                 | 94.55%               | 82.90%               |

Table 7. BUSCO completeness for 20 gymnosperm taxa and an angiosperm outgroup (*Amborella trichopoda*)

| TreeGenes code             | Pita                      | Pnte                     | Psme                         | Segi                            | Sese                        | Thoc                      | Amtr                        |
|----------------------------|---------------------------|--------------------------|------------------------------|---------------------------------|-----------------------------|---------------------------|-----------------------------|
| taxon                      | <i>Pinus taeda</i>        | <i>Pinus tecunumanii</i> | <i>Pseudotsuga menziesii</i> | <i>Sequoiadendron giganteum</i> | <i>Sequoia sempervirens</i> | <i>Thuja occidentalis</i> | <i>Amborella trichopoda</i> |
|                            | Loblolly pine             | Tecun Uman Pine          | Douglas-fir                  | Giant sequoia                   | Coast redwood               | Eastern white cedar       |                             |
| Unigene set                |                           |                          |                              |                                 |                             |                           |                             |
| Data source(s)             | annotation, transcriptome | transcriptome            | annotation, transcriptome    | annotation                      | transcriptome               | transcriptome             | annotation                  |
| Number of unigenes         | 45255                     | 22287                    | 70036                        | 42325                           | 21798                       | 19208                     | 24753                       |
| Average length of unigenes | 392.03                    | 450.75                   | 289.17                       | 328.80                          | 303.28                      | 338.63                    | 318.60                      |
| <b>BUSCOv4.0.2</b>         |                           |                          |                              |                                 |                             |                           |                             |
| Complete                   | 1090                      | 1517                     | 1152                         | 1113                            | 1064                        | 1187                      | 1303                        |
| Complete & single copy     | 1000                      | 1453                     | 1030                         | 1057                            | 1030                        | 1149                      | 1292                        |
| Complete & duplicated      | 90                        | 64                       | 122                          | 56                              | 34                          | 38                        | 11                          |
| Fragmented                 | 161                       | 22                       | 253                          | 232                             | 221                         | 172                       | 49                          |
| Missing                    | 363                       | 75                       | 209                          | 269                             | 329                         | 255                       | 23                          |
| Total searched             | 1614                      | 1614                     | 1614                         | 1614                            | 1614                        | 1614                      | 1614                        |
| % complete                 | 67.53%                    | 93.99%                   | 71.38%                       | 68.96%                          | 65.92%                      | 73.54%                    | 80.73%                      |

\*Not a TreeGenes code; Amtr peptide data were downloaded from Ensembl (Howe et al., 2019).



Table 8. Orthogroup assignment summary for 20 gymnosperm taxa and an angiosperm outgroup (*Amborella trichopoda*; Amtr).

|                                                     | <b>Abba</b>           | <b>Gibi</b>          | <b>Gnmo</b>          | <b>Megl</b>                         | <b>Pama</b>          | <b>Pial</b>             | <b>Piba</b>            |
|-----------------------------------------------------|-----------------------|----------------------|----------------------|-------------------------------------|----------------------|-------------------------|------------------------|
|                                                     | <i>Abies balsamea</i> | <i>Gingko biloba</i> | <i>Gnetum gnemon</i> | <i>Metasequoia glyptostroboides</i> | <i>Picea mariana</i> | <i>Pinus albicaulis</i> | <i>Pinus banksiana</i> |
| Number of genes                                     | 21250                 | 24753                | 110296               | 21887                               | 19237                | 22876                   | 27226                  |
| Number of genes in orthogroups                      | 20397                 | 19981                | 76213                | 19648                               | 18318                | 21197                   | 24571                  |
| Number of unassigned genes                          | 853                   | 4772                 | 34083                | 2239                                | 919                  | 1679                    | 2655                   |
| Percentage of genes in orthogroups                  | 96                    | 80.7                 | 69.1                 | 89.8                                | 95.2                 | 92.7                    | 90.2                   |
| Percentage of unassigned genes                      | 4                     | 19.3                 | 30.9                 | 10.2                                | 4.8                  | 7.3                     | 9.8                    |
| Number of orthogroups containing species            | 12169                 | 10832                | 27140                | 10875                               | 12029                | 13090                   | 14212                  |
| Percentage of orthogroups containing species        | 27.2                  | 24.2                 | 60.6                 | 24.3                                | 26.9                 | 29.2                    | 31.7                   |
| Number of species-specific orthogroups              | 29                    | 757                  | 6081                 | 531                                 | 13                   | 57                      | 94                     |
| Number of genes in species-specific orthogroups     | 64                    | 4029                 | 20762                | 2482                                | 28                   | 150                     | 216                    |
| Percentage of genes in species-specific orthogroups | 0.3                   | 16.3                 | 18.8                 | 11.3                                | 0.1                  | 0.7                     | 0.8                    |

Table 8. Orthogroup assignment summary for 20 gymnosperm taxa and an angiosperm outgroup (*Amborella trichopoda*; Amtr).

|                                                     | <b>Pice</b>         | <b>Picn</b>              | <b>Pila</b>              | <b>Pima</b>             | <b>Pimn</b>            | <b>Pipt</b>         | <b>Pist</b>          |
|-----------------------------------------------------|---------------------|--------------------------|--------------------------|-------------------------|------------------------|---------------------|----------------------|
|                                                     | <i>Pinus cembra</i> | <i>Pinus canariensis</i> | <i>Pinus lambertiana</i> | <i>Pinus massoniana</i> | <i>Pinus monticola</i> | <i>Pinus patula</i> | <i>Pinus strobus</i> |
| Number of genes                                     | 17994               | 22631                    | 48172                    | 33891                   | 17447                  | 46563               | 21697                |
| Number of genes in orthogroups                      | 17772               | 21501                    | 44729                    | 29596                   | 16858                  | 40872               | 21005                |
| Number of unassigned genes                          | 222                 | 1130                     | 3443                     | 4295                    | 589                    | 5691                | 692                  |
| Percentage of genes in orthogroups                  | 98.8                | 95                       | 92.9                     | 87.3                    | 96.6                   | 87.8                | 96.8                 |
| Percentage of unassigned genes                      | 1.2                 | 5                        | 7.1                      | 12.7                    | 3.4                    | 12.2                | 3.2                  |
| Number of orthogroups containing species            | 11602               | 12880                    | 16398                    | 17568                   | 11767                  | 19669               | 12951                |
| Percentage of orthogroups containing species        | 25.9                | 28.8                     | 36.6                     | 39.2                    | 26.3                   | 43.9                | 28.9                 |
| Number of species-specific orthogroups              | 5                   | 29                       | 763                      | 238                     | 7                      | 678                 | 15                   |
| Number of genes in species-specific orthogroups     | 10                  | 62                       | 2756                     | 529                     | 25                     | 1643                | 32                   |
| Percentage of genes in species-specific orthogroups | 0.1                 | 0.3                      | 5.7                      | 1.6                     | 0.1                    | 3.5                 | 0.1                  |

Table 8. Orthogroup assignment summary for 20 gymnosperm taxa and an angiosperm outgroup (*Amborella trichopoda*; Amtr).

|                                                     | <b>Pita</b>        | <b>Pnte</b>              | <b>Psme</b>                  | <b>Segi</b>                     | <b>Sese</b>                 | <b>Thoc</b>               | <b>Amtr</b>                 |
|-----------------------------------------------------|--------------------|--------------------------|------------------------------|---------------------------------|-----------------------------|---------------------------|-----------------------------|
|                                                     | <i>Pinus taeda</i> | <i>Pinus tecunumanii</i> | <i>Pseudotsuga menziesii</i> | <i>Sequoiadendron giganteum</i> | <i>Sequoia sempervirens</i> | <i>Thuja occidentalis</i> | <i>Amborella trichopoda</i> |
| Number of genes                                     | 42848              | 22287                    | 70036                        | 42325                           | 21798                       | 19208                     | 24753                       |
| Number of genes in orthogroups                      | 39461              | 21901                    | 59920                        | 38934                           | 20070                       | 17835                     | 19981                       |
| Number of unassigned genes                          | 3387               | 386                      | 10116                        | 3391                            | 1728                        | 1373                      | 4772                        |
| Percentage of genes in orthogroups                  | 92.1               | 98.3                     | 85.6                         | 92                              | 92.1                        | 92.9                      | 80.7                        |
| Percentage of unassigned genes                      | 7.9                | 1.7                      | 14.4                         | 8                               | 7.9                         | 7.1                       | 19.3                        |
| Number of orthogroups containing species            | 14166              | 13044                    | 18538                        | 15665                           | 13230                       | 11612                     | 10832                       |
| Percentage of orthogroups containing species        | 31.6               | 29.1                     | 41.4                         | 35                              | 29.5                        | 25.9                      | 24.2                        |
| Number of species-specific orthogroups              | 479                | 14                       | 1616                         | 607                             | 47                          | 54                        | 757                         |
| Number of genes in species-specific orthogroups     | 1441               | 33                       | 7261                         | 3364                            | 103                         | 123                       | 4029                        |
| Percentage of genes in species-specific orthogroups | 3.4                | 0.1                      | 10.4                         | 7.9                             | 0.5                         | 0.6                       | 16.3                        |

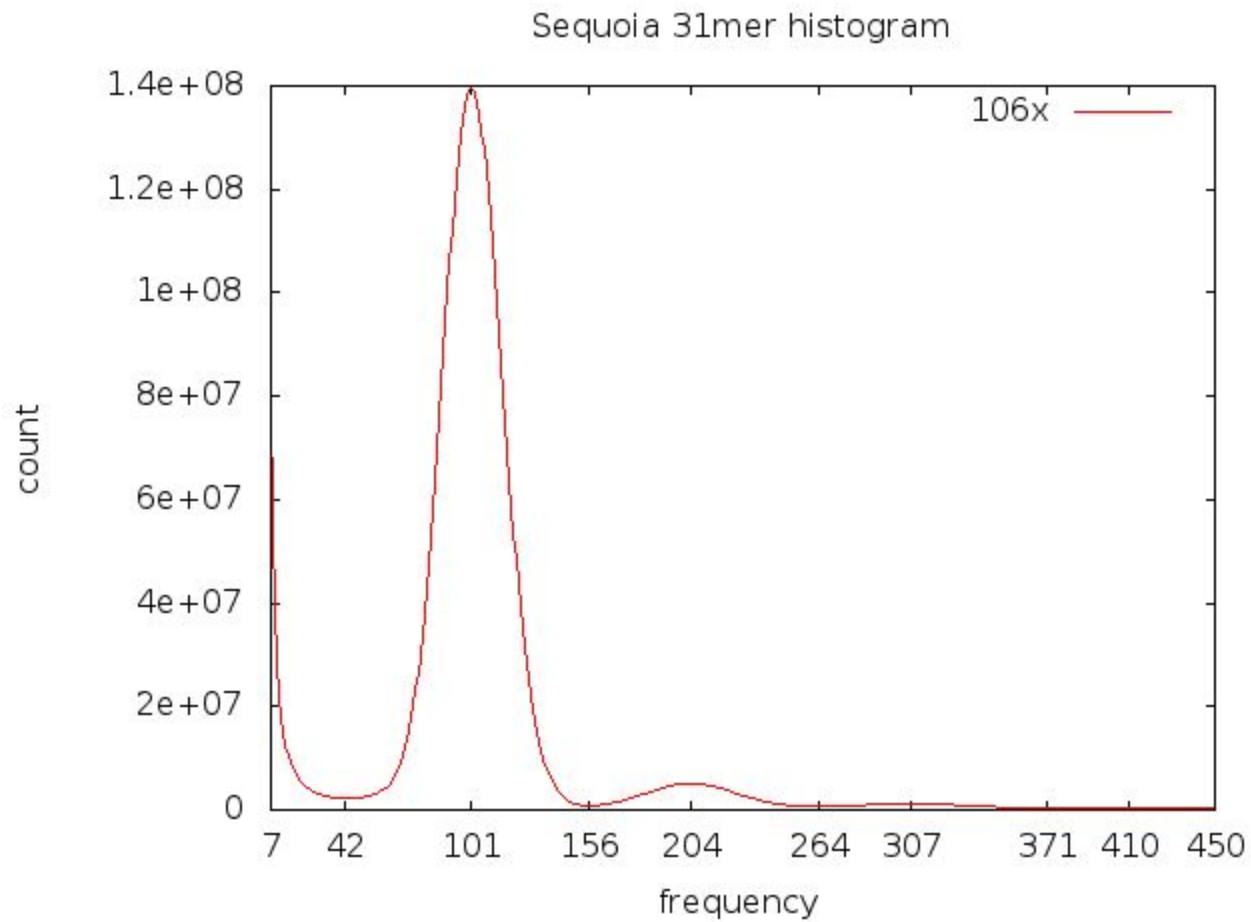

Figure 1. The histogram of 31-mer count in Illumina paired end reads. The red curve shows the number of 31-mers that are present in the reads  $X$  times, where  $X$  is the frequency plotted on horizontal axis. The main peak is at 101.

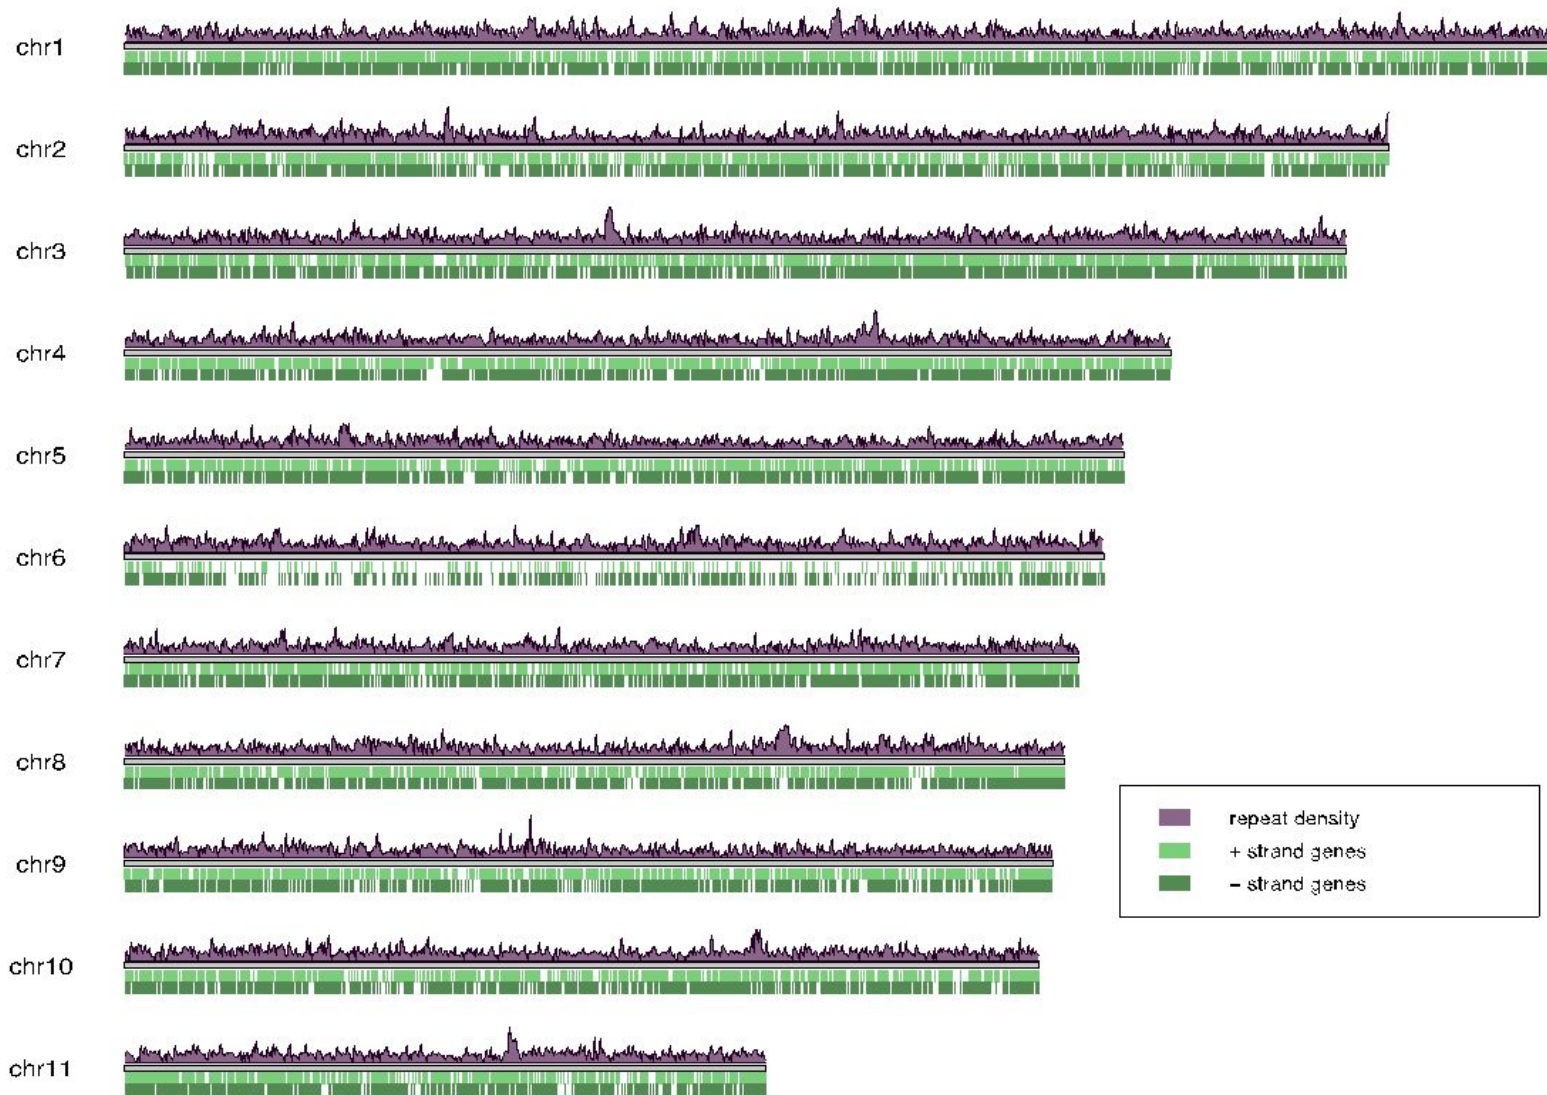

Figure 2. Repeat density and gene content of giant sequoia 2.0. Light green bars are + strand genes, dark green bars are - strand genes. Repeat density in purple, plotted in 1kb windows.

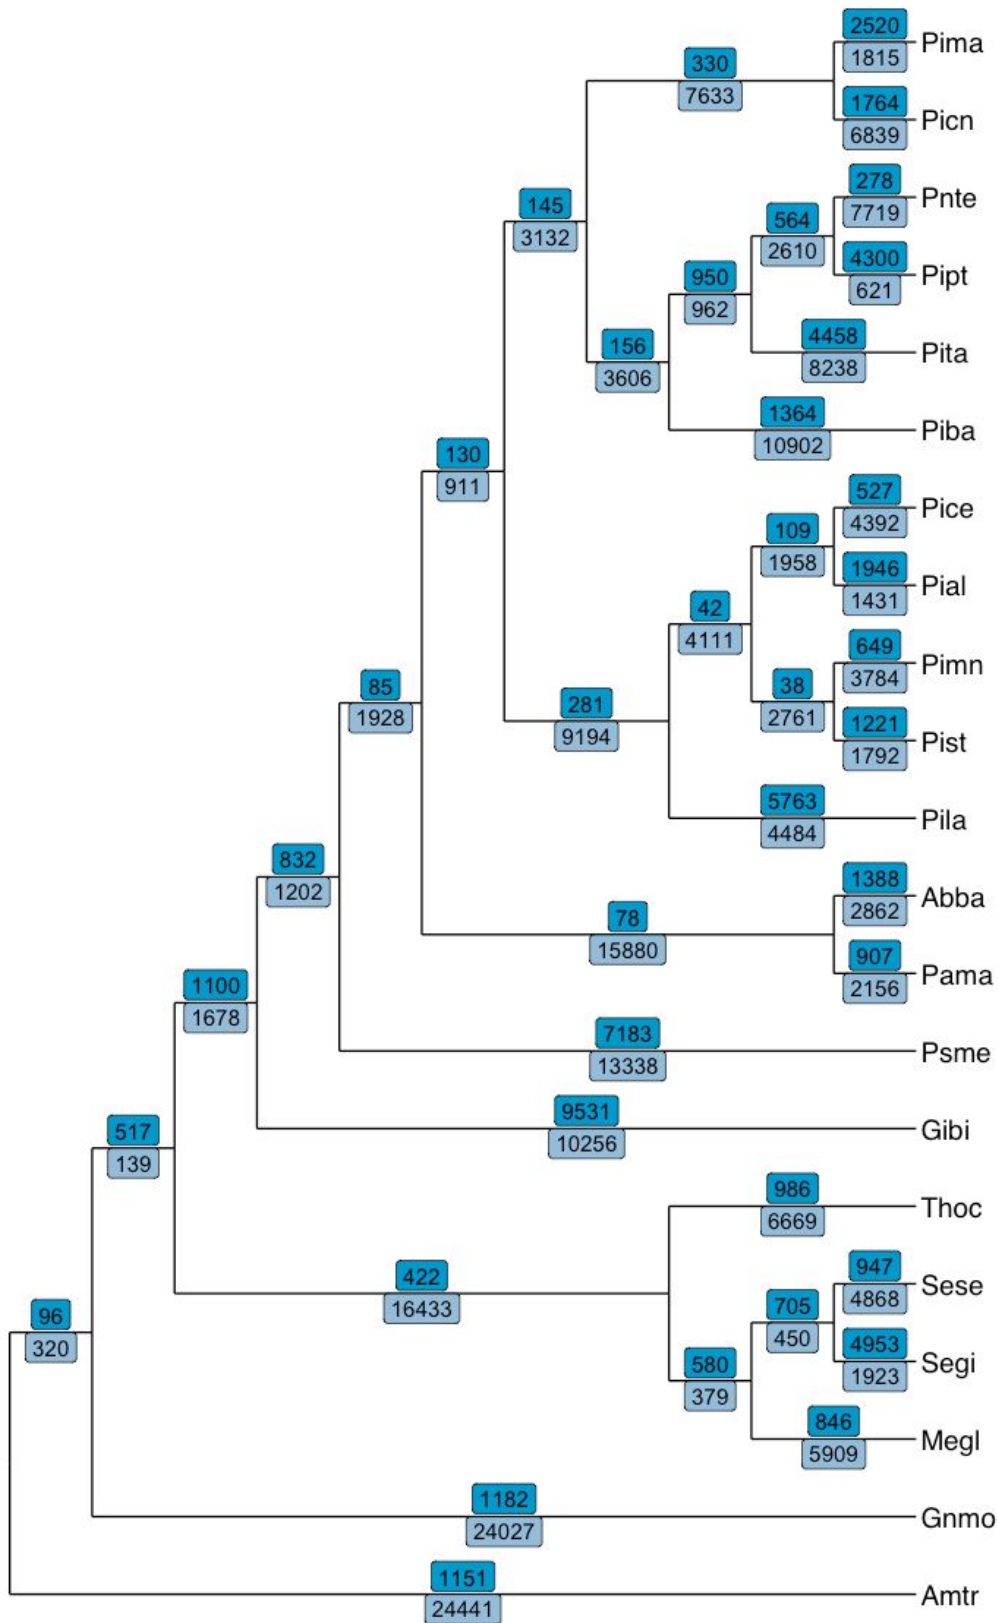

Figure 3: Gene family evolution along a gymnosperm cladogram. Numbers of expanded (bright blue, above branches) and contracted (light blue, below branches) orthogroups indicated in along each branch. Giant sequoia (Segi) experienced an overall expansion, with 4,953 orthogroups expanding and 1,923 contracting.

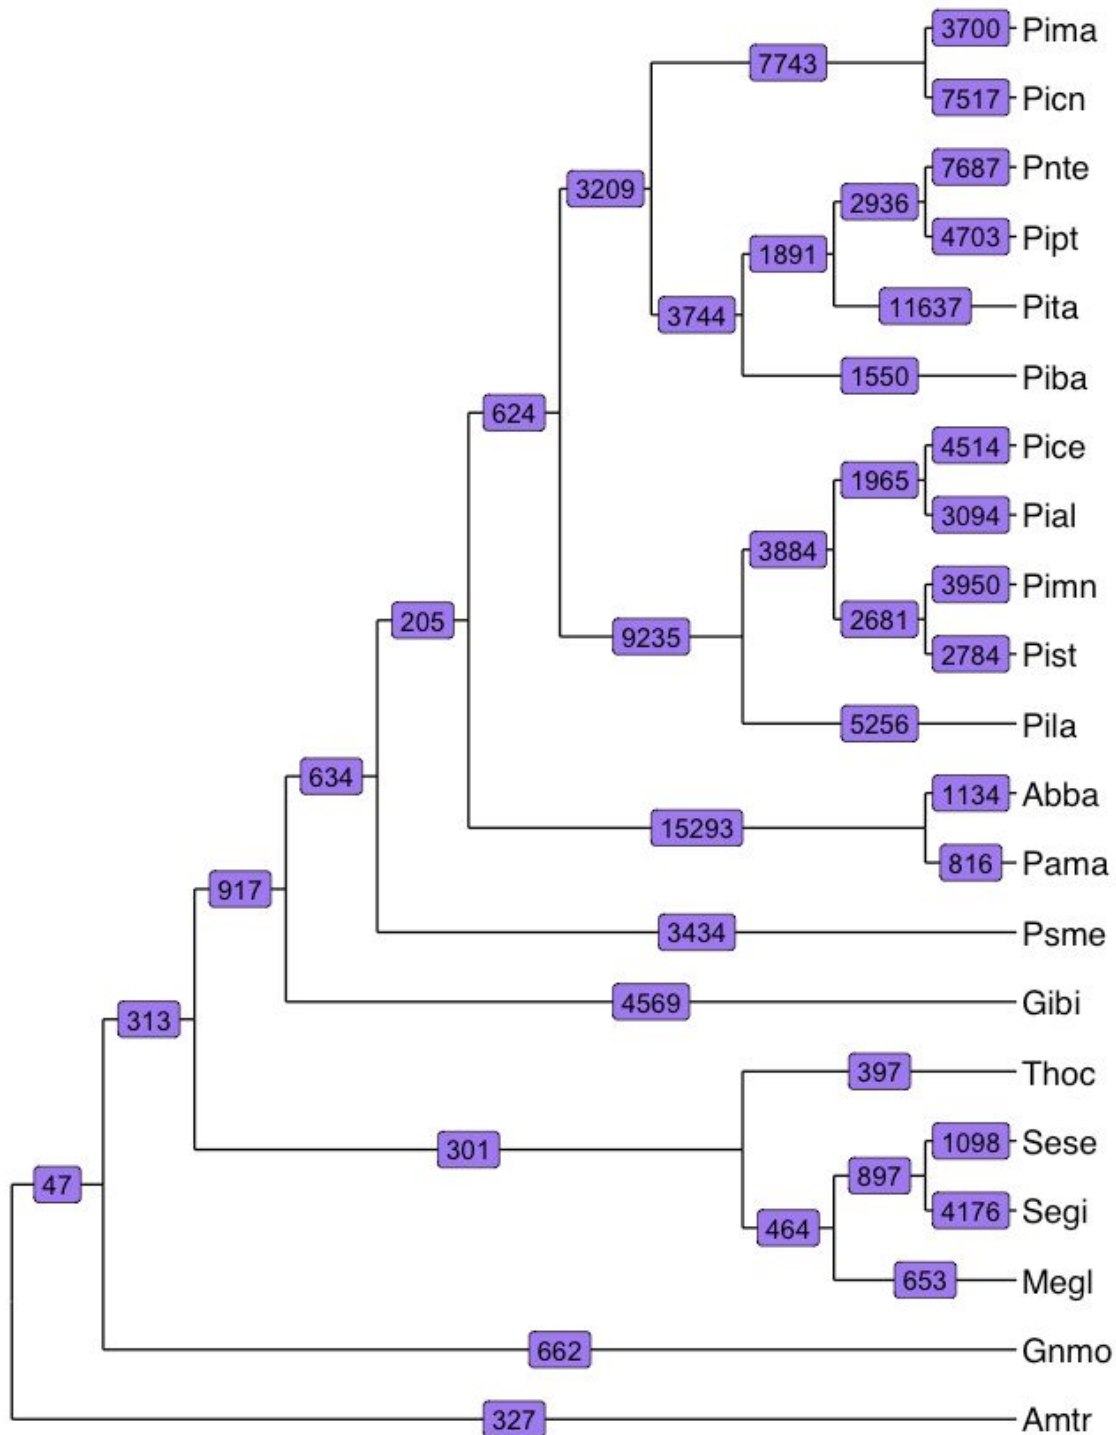

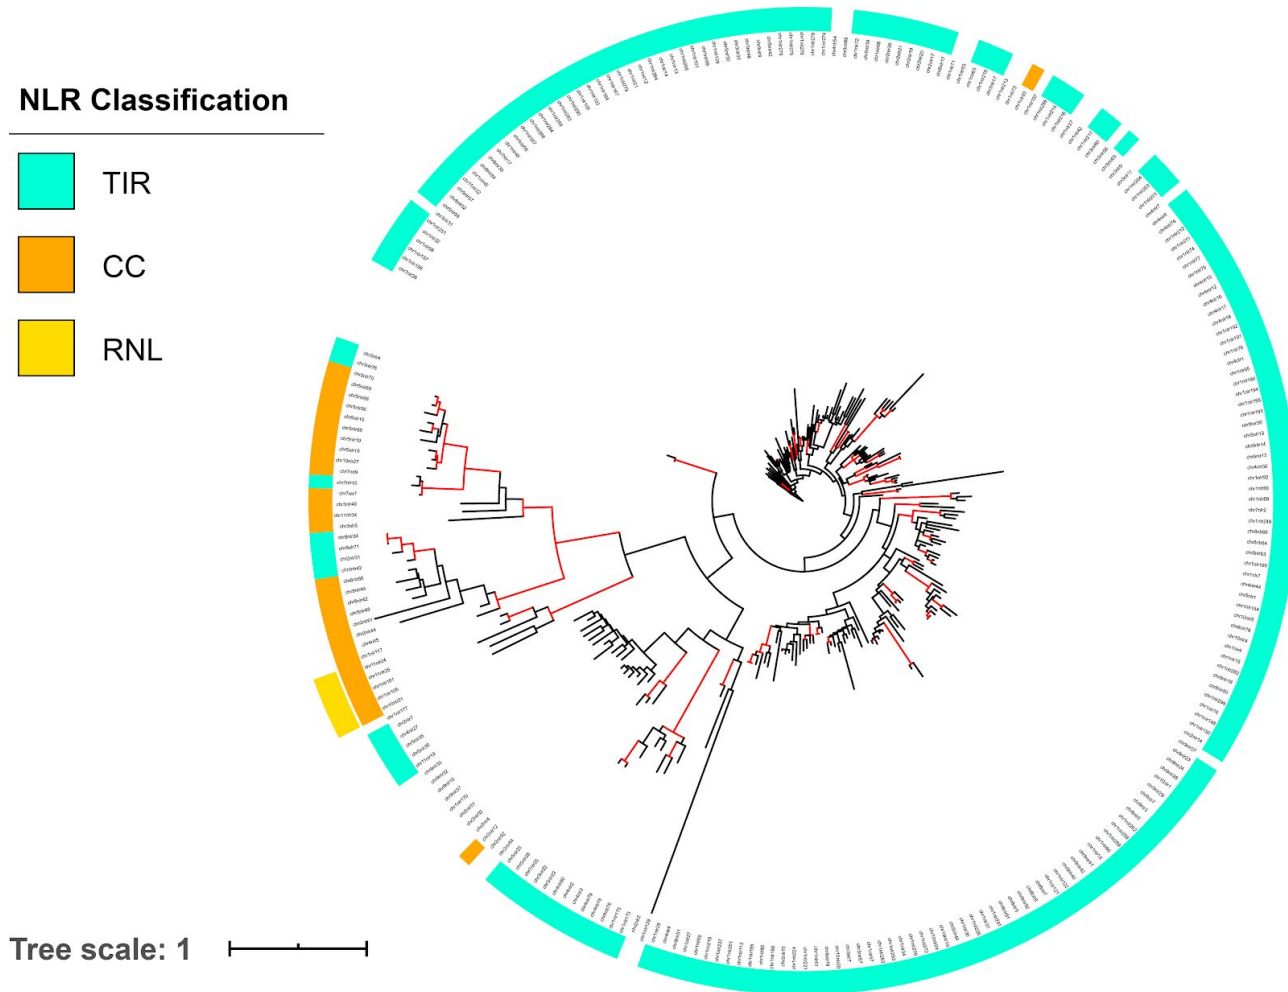

Figure 5: Maximum likelihood tree of NB-ARC domains of the 257 consensus NLR genes detected in the Segi assembly. Red branches indicate bootstrap support greater than 70%. The inner ring indicates predicted N-terminal TIR (blue) or CC (orange) domains. The outer ring indicates presence of an RPW8 motif present in the RNL sub-group of CC-NLRs. Tree is available at: <http://itol.embl.de/shared/acr242>



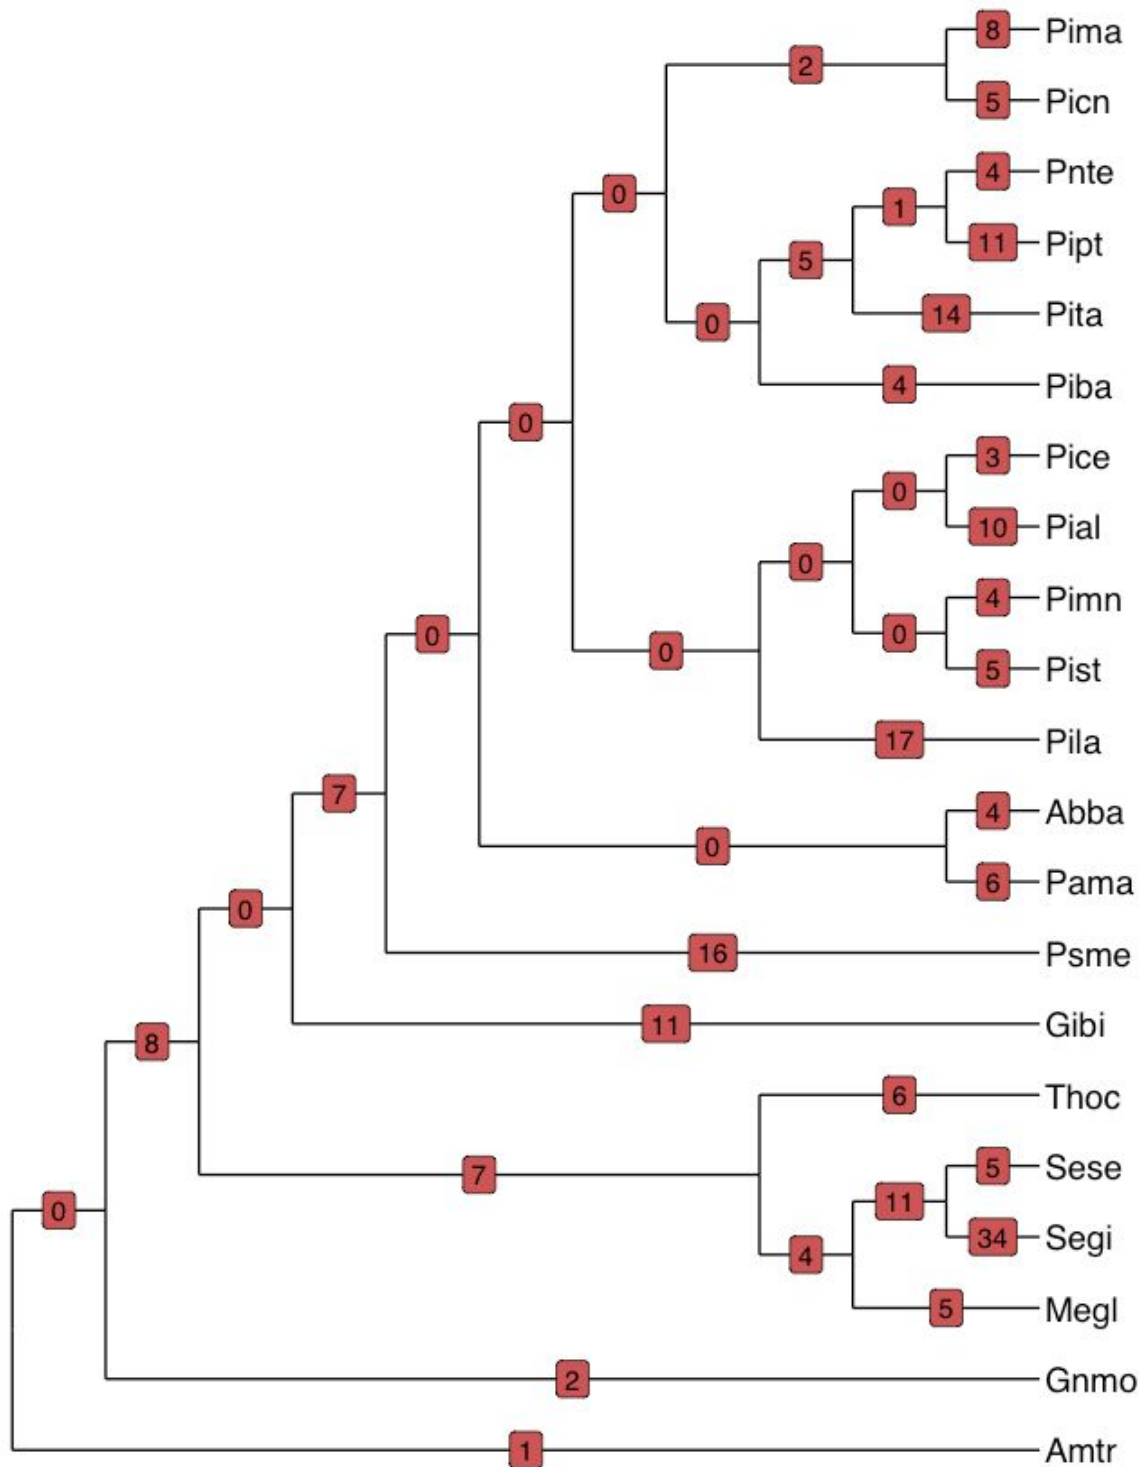

Figure 6: Rapid expansion in NLR-associated orthogroups along a gymnosperm cladogram. Numbers (red) on each branch indicate the number of rapidly expanding NLR orthogroups. Giant sequoia (Segi) has experienced rapid expansion in 34 NLR-associated orthogroups.

Table S1. Completeness of conifer genome assemblies assessed with BUSCOv3.0.2. Giant sequoia 2.0 is consistent with completeness of other conifer assemblies.

|                                     | <i>Sequoiadendron giganteum</i> | <i>Picea glauca</i> | <i>Picea abies</i> | <i>Pinus lambertiana</i> | <i>Pinus taeda</i> | <i>Pseudotsuga menziesii</i> |
|-------------------------------------|---------------------------------|---------------------|--------------------|--------------------------|--------------------|------------------------------|
|                                     | Giant sequoia                   | White spruce        | Norway spruce      | Sugar pine               | Loblolly pine      | Doug fir                     |
| Complete BUSCOs (C)                 | 611                             | 443                 | 505                | 396                      | 636                | 484                          |
| Complete and single-copy BUSCOs (S) | 575                             | 316                 | 434                | 349                      | 508                | 412                          |
| Complete and duplicated BUSCOs (D)  | 36                              | 127                 | 71                 | 47                       | 128                | 72                           |
| Fragmented BUSCOs (F)               | 192                             | 182                 | 150                | 172                      | 102                | 110                          |
| Missing BUSCOs (M)                  | 811                             | 815                 | 785                | 872                      | 702                | 846                          |
| Total BUSCO groups searched         | 1614                            | 1440                | 1440               | 1440                     | 1440               | 1440                         |
| Percentage found                    | 37.86%                          | 30.76%              | 35.07%             | 27.50%                   | 44.17%             | 33.61%                       |

Table S2. Classification and associated percentage of genome masked by repetitive elements in giant sequoia 2.0

| <b>Repeat Class</b> | <b>Masked % of genome</b> |
|---------------------|---------------------------|
| <b>DNA</b>          |                           |
| DNA/CMC-EnSpm       | 0.36161                   |
| DNA/MuLE-MuDR       | 1.55370                   |
| DNA/Sola            | 0.77113                   |
| DNA/TcMar-Fot1      | 0.05913                   |
| DNA/hAT-Tag1        | 0.47514                   |
| DNA/hAT-Tip100      | 0.13902                   |
| <i>DNA total</i>    | 3.35974                   |
| <b>LINE</b>         |                           |
| LINE/L1             | 1.77165                   |
| LINE/L1-Tx1         | 0.40261                   |
| LINE/Penelope       | 0.02434                   |
| LINE/RTE-X          | 0.11875                   |
| LINE/Tad1?          | 0.00674                   |
| <i>LINE total</i>   | 2.32409                   |
| <b>LTR</b>          |                           |
| LTR                 | 0.21792                   |
| LTR/Copia           | 8.05066                   |
| LTR/ERVK            | 0.46223                   |
| LTR/Gypsy           | 19.62522                  |
| <i>LTR total</i>    | 28.35604                  |
| Low_complexity      | 0.16773                   |
| RC/Helitron         | 0.07451                   |
| Satellite           | 0.00005                   |
| Simple_repeat       | 2.03401                   |
| Unknown             | 42.34551                  |

Table S3 Orthogroup clustering of 695,700 protein sequences from twenty gymnosperms plus an outgroup (*Amborella trichopoda*)

|                                                     |        |
|-----------------------------------------------------|--------|
| Number of species                                   | 21     |
| Number of genes                                     | 695700 |
| Number of genes in orthogroups                      | 611441 |
| Number of unassigned genes                          | 84259  |
| Percentage of genes in orthogroups                  | 87.9   |
| Percentage of unassigned genes                      | 12.1   |
| Number of orthogroups                               | 44797  |
| Number of species-specific orthogroups              | 12121  |
| Number of genes in species-specific orthogroups     | 45127  |
| Percentage of genes in species-specific orthogroups | 6.5    |
| Mean orthogroup size                                | 13.6   |
| Median orthogroup size                              | 4      |
| G50 (assigned genes)                                | 30     |
| G50 (all genes)                                     | 27     |
| O50 (assigned genes)                                | 4762   |
| O50 (all genes)                                     | 6250   |
| Number of orthogroups with all species present      | 5953   |
| Number of single-copy orthogroups                   | 206    |

Table S4. Annotation summary for 607 species-specific giant sequoia orthogroups

|                                                                           |            |
|---------------------------------------------------------------------------|------------|
| <b>Total Sequences:</b>                                                   | <b>607</b> |
| <b>Similarity Search</b>                                                  |            |
| Total unique sequences with an alignment                                  | 218        |
| Total unique sequences without an alignment                               | 389        |
| <b>Gene Families</b>                                                      |            |
| Total unique sequences with family assignment                             | 528        |
| Total unique sequences without family assignment                          | 79         |
| Total unique sequences with at least one GO term                          | 429        |
| Total unique sequences with at least one pathway (KEGG) assignment        | 124        |
| <b>Totals</b>                                                             |            |
| Total unique sequences annotated (similarity search alignments only)      | 8          |
| Total unique sequences annotated (gene family assignment only)            | 318        |
| Total unique sequences annotated (gene family and/or similarity search)   | 536        |
| Total unique sequences unannotated (gene family and/or similarity search) | 71         |

### NLR Classification

- TIR
- CC
- RNL

Tree scale: 1

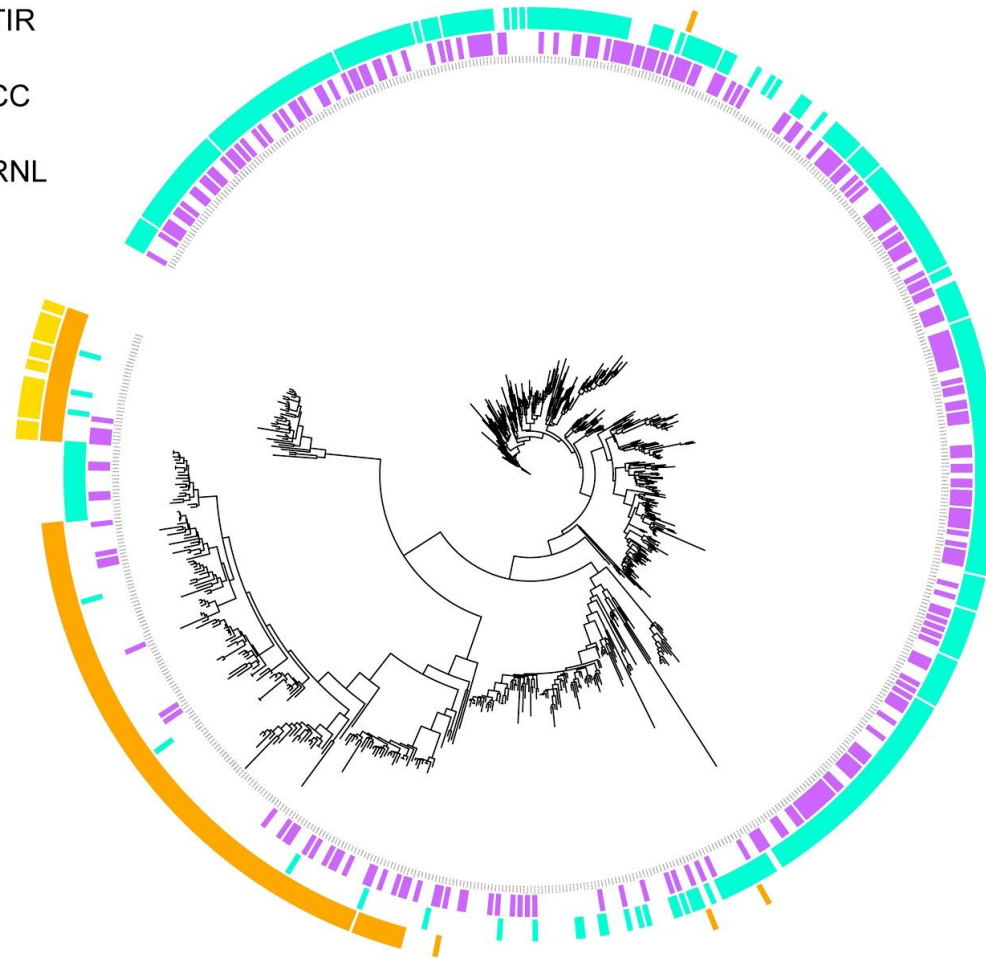

Supplemental Figure 1: Maximum likelihood tree of NB-ARC domains of all NLR-annotated detected NLR genes. The purple ring represents consensus NLR genes. N-terminal domains are indicated in the outer rings (TIR- light blue, CC- orange, RNL- yellow).
